1 **KDM6B-dependent chromatin remodelling underpins effective virus-specific CD8<sup>+</sup> T**  
2 **cell differentiation.**

3

4 **Running title:** Early epigenetic reprogramming underpins virus specific CD8<sup>+</sup> T cell  
5 responses

6

7 Jasmine Li<sup>1</sup>, Kristine Hardy<sup>2</sup>, Moshe Olshansky<sup>1,3</sup>, Adele Barugahare<sup>1</sup>, Linden J. Gearing<sup>4</sup>,  
8 Julia E. Prier<sup>5</sup>, Xavier Y.X. Sng<sup>6</sup>, Michelle Ly Thai Nguyen<sup>5,7</sup>, Dana Piovesan<sup>5</sup>, Brendan  
9 Russ<sup>1</sup>, Nicole L. La Gruta<sup>6</sup>, Paul J. Hertzog<sup>4</sup>, Sudha Rao<sup>8</sup> and Stephen J. Turner<sup>1,4,9,\*</sup>.

10

11 <sup>1</sup>Department of Microbiology, Biomedicine Discovery Institute, Monash University, Clayton,  
12 VIC 3800, Australia

13 <sup>2</sup>Epigenetics and Transcription Laboratory Melanie Swan Memorial Translational Centre,  
14 Sci-Tech, University of Canberra, Bruce 2617 ACT, Australia

15 <sup>3</sup>Present address: Computational Biology & Bioinformatics, Baker Heart & Diabetes  
16 Institute, Melbourne, VIC 3004, Australia

17 <sup>4</sup>Hudson Institute for Medical Research, Clayton, VIC 3168, Australia

18 <sup>5</sup>Department of Microbiology and Immunology, the Doherty Institute, University of  
19 Melbourne, Parkville VIC 3010, Australia

20 <sup>6</sup>Department of Biochemistry and Molecular Biology, Biomedicine Discovery Institute,  
21 Monash University, Clayton, VIC 3800, Australia

22 <sup>7</sup>Present address: Department of Microbiology and Immunology, University of California,  
23 San Francisco, California, U.S.A.

24 <sup>8</sup>QIMR Berghofer Gene Regulation and Translational Medicine laboratory, Department of  
25 Immunology, QIMR Berghofer Medical Research Institute, Brisbane, QLD, Australia

26 <sup>9</sup>Lead contact

27 \*Correspondence: [stephen.turner@monash.edu](mailto:stephen.turner@monash.edu) (S.J.T)

28 **SUMMARY**

29 Naive CD8<sup>+</sup> T cell activation results in an autonomous program of cellular proliferation and  
30 differentiation. However, the mechanisms that underpin this process are unclear. Here we  
31 profiled genome-wide changes in chromatin accessibility, gene transcription and the  
32 deposition of a key chromatin modification (H3K27me3) early after naive CD8<sup>+</sup> T cell  
33 activation. Rapid upregulation of the histone demethylase, KDM6B, prior to first cell division  
34 was required for initiating H3K27me3 removal at genes essential for subsequent T cell  
35 differentiation and proliferation. Inhibition of KDM6B-dependent H3K27me3 demethylation  
36 limited the magnitude of an effective primary virus-specific CD8<sup>+</sup> T cell response and the  
37 formation of memory CD8<sup>+</sup> T cell populations. Accordingly, we define the early spatio-  
38 temporal events underpinning early lineage-specific epigenetic reprogramming that is  
39 necessary for autonomous CD8<sup>+</sup> T cell proliferation and differentiation.

40

41 **Keywords:** CD8<sup>+</sup> T cell, epigenetics, histone demethylase, T cell memory, virus immunity, T  
42 cell activation

## 43 INTRODUCTION

44       Upon virus infection, naïve, cytotoxic T lymphocyte (CTL) activation results in a  
45 largely autonomous program of differentiation that results in proliferation and acquisition of  
46 lineage-specific effector functions (van Stipdonk et al., 2003). The acquisition of lineage-  
47 specific CTL functions, such as production of pro-inflammatory cytokines interferon (IFN)- $\gamma$ ,  
48 tumour necrosis factor (TNF) (Denton et al., 2011; La Gruta et al., 2004), and expression of  
49 cytolytic effector molecules (Jenkins et al., 2007; Kagi et al., 1994; Moffat et al., 2009;  
50 Peixoto et al., 2007) helps limit and clear virus infection. Once the infection is cleared, the  
51 expanded effector CTL population contracts, leaving a pool of long-lived, pathogen-specific  
52 memory T cells. In contrast to naïve CD8<sup>+</sup> T cells, virus-specific memory CTLs are able to  
53 respond more readily and rapidly to subsequent infections without the need for further  
54 differentiation (Kaech et al., 2002; La Gruta et al., 2004; Lalvani et al., 1997; Oehen and  
55 Brduscha-Riem, 1998; Veiga-Fernandes et al., 2000). This function enables rapid control of a  
56 secondary infection leading to immune protection.

57       Optimal virus-specific CD8<sup>+</sup> T cell differentiation is underpinned by the coordinated  
58 expression of several transcription factors (TFs). The BATF TF has been shown to act early  
59 after activation and works in tandem with IRF4 and JUN family members to regulate  
60 transcriptional activation of gene loci involved in early immune T cell activation, cell  
61 survival and metabolic pathways (Kurachi et al., 2014; Xin et al., 2016). Failure to engage  
62 BATF/JUN/IRF4 dependent programs results in diminished CD8<sup>+</sup> T cell expansion and  
63 function. BATF/JUN/IRF4 activity also results in subsequent upregulation of other TFs such  
64 as T-BET (encoded by *Tbx21*), RUNX3 and BLIMP1 (encoded by *Prdm1*), all known to be  
65 essential for effective CD8<sup>+</sup> T cell differentiation (Cruz-Guilloty et al., 2009; Kallies et al.,  
66 2009; Kurachi et al., 2014; Wang et al., 2018; Xin et al., 2016). The activation of T-BET and  
67 RUNX3 consolidate commitment to the effector CTL lineage (Cruz-Guilloty et al., 2009;

68 Intlekofer et al., 2008; Intlekofer et al., 2005), whilst BLIMP1 is required for terminal  
69 effector CTL differentiation (Kallies et al., 2009). These data demonstrate that the stepwise  
70 progression of TF expression during virus-specific CTL differentiation is critical for optimal  
71 responses. Interestingly, while at little as 2 hours (hrs) of antigenic stimulation is sufficient to  
72 initiate CD8<sup>+</sup> T cell proliferation (van Stipdonk et al., 2001), sustained stimulation for at  
73 least 20 hrs is required to install an optimal effector response (van Stipdonk et al., 2003).  
74 While this suggests that extensive cellular reprogramming prior to the first cell division is  
75 required to ensure optimal CD8<sup>+</sup> T cell responses, the exact molecular events that trigger this  
76 process are not fully understood.

77         Within eukaryotic cells, DNA is wrapped around a complex of histone proteins  
78 known as a nucleosome, with the nucleosome-DNA complex termed chromatin. Post-  
79 translational modification (PTM) of histones is an important mechanism for directing gene  
80 expression programs necessary for the process of differentiation in an array of cellular  
81 contexts. Histone PTMs contribute to regulation of transcription by providing a platform that  
82 promotes binding of TFs and chromatin remodelling proteins (Kouzarides, 2007). We and  
83 others, have demonstrated that virus-specific CTL differentiation is associated with genome  
84 wide changes in chromatin accessibility and PTMs (Denton et al., 2011; Northrop et al.,  
85 2008; Russ et al., 2014; Russ et al., 2017; Scott-Browne et al., 2016; Sen et al., 2016; Wang  
86 et al., 2018; Wei et al., 2009; Zediak et al., 2011). More recently, extensive changes in  
87 chromatin accessibility, indicative of transcriptional activation was shown to occur prior to  
88 first cell division, and was dependent on RUNX3 (Wang et al., 2018). Our own analysis  
89 showed that in the naive state, there is co-deposition of histone modifications associated with  
90 transcriptional activation (H3K4me3) and repression (H3K27me3) at CD8<sup>+</sup> T cell lineage  
91 specific gene promoters and enhancers (Russ et al., 2014; Russ et al., 2017). Upon T cell  
92 activation, loss of H3K27me3 at gene promoters and enhancers was broadly associated with

93 transcriptional upregulation of these poised genes (Russ et al., 2014). These data suggest that  
94 the presence of H3K4me3 at specific gene loci ensures that the genome of naive CD8<sup>+</sup> T cells  
95 is preconfigured for transcriptional activation, but it is maintained transcriptionally poised via  
96 co-localisation of H3K27me3. While removal of H3K27me3 appears to be a key step in the  
97 initiation of naive T cell activation, the timing, genomic targets and specific molecular  
98 mechanisms of this initiating event remain to be determined.

99         The removal of H3K27me3 is specifically catalysed by KDM6A and KDM6B  
100 demethylases (Agger et al., 2007). During thymic development, H3K37me3 status is a highly  
101 dynamic and stage specific, with KDM6A and KDM6B both playing a key role in  
102 modulating these patterns (Manna et al., 2015; Zhang et al., 2012). In mature CD4<sup>+</sup> T cells,  
103 KDM6A activity was required for the rapid expression of several key transcription factors,  
104 such as T-BET and STAT family members (LaMere et al., 2017). *Kdm6b*-deficient CD4<sup>+</sup> T  
105 cells demonstrate dysregulated and inappropriate fate specification under T<sub>H</sub> skewing  
106 conditions with promotion of T<sub>H</sub>2/T<sub>H</sub>17 lineages at the expense of T<sub>H</sub>1 and FOXP3 T  
107 regulatory cells (Li et al., 2014). Together these data suggest that dynamic modulation of  
108 H3K27me3 appears to be critical for multiple stages of T cell differentiation, both during  
109 development and activation. However, precisely how modulation of H3K27me3 during the  
110 very early stages of T cell activation promote effective T cell immunity is not fully  
111 understood.

112         Despite our earlier observations demonstrating that rapid removal of H3K27me3 is a  
113 key outcome of naive, virus-specific CD8<sup>+</sup> T cell activation (Denton et al., 2011; Russ et al.,  
114 2014; Russ et al., 2017), there is little understanding of the molecular mechanisms by which  
115 removal of H3K27 facilitates CD8 T cell differentiation. Moreover, the respective roles of  
116 KDM6A and KDM6B in mediating H3K27me3 removal remain wholly unknown. Here, we  
117 determine that KDM6B is rapidly upregulated upon T cell activation and prior to first cell

118 division. This coincides with a step-wise engagement of transcriptional modules that were  
119 linked with rapid H3K27me3 demethylation. This occurred at genes involved in a broad  
120 range of cellular support processes that underpin optimal T cell activation and proliferation.  
121 Initial H3K27me3 demethylation, and increased chromatin accessibility, targeted regions  
122 enriched for BATF/IRF/JUN binding sites, with T-BET and GATA TF binding sites (TFBS)  
123 evident at later stages of H3K27me3 demethylation. Small molecule and shRNA inhibition of  
124 KDM6B-dependent H3K27me3 demethylation limited the magnitude of an effective primary  
125 virus specific CD8<sup>+</sup> T cell response and formation of functional memory CD8<sup>+</sup> T cell  
126 populations capable of recall. Our data show that H3K27me3 methylation acts as a molecular  
127 handbrake on the initiation of effective T cell responses, with H3K27me3 demethylation  
128 being a key step at the very earliest stages of T cell activation enabling optimal lineage-  
129 specific reprogramming of effector and memory CD8<sup>+</sup> T cells.

130



131 **Results**

132 **Rapid upregulation of KDM6b occurs after naive CD8<sup>+</sup> T cell activation.**

133 We have previously demonstrated that specific transcriptional and epigenetic changes  
134 occur within 5 hours (hrs) of naive CD8<sup>+</sup> T cell activation (Denton et al., 2011; Russ et al.,  
135 2014; Russ et al., 2017). In particular, we showed that loss of H3K27me3 occurs rapidly after  
136 naive T cell activation (Russ et al., 2014). To better understand the global transcriptional  
137 changes associated with the rapid loss of H3K27me3, naive (CD44<sup>int/lo</sup>CD62L<sup>hi</sup>) OT-I CD8<sup>+</sup>  
138 T cells were sorted after *in vitro* activation with their cognate peptide antigen, the ovalbumin  
139 (OVA<sub>257-264</sub>, SIINFEKL) N4 peptide. Changes in gene transcription at early (3, 5hrs) and late  
140 (24hrs) times post-stimulation were assessed by RNA-seq and differentially expressed genes  
141 (DEGs) that were significantly up or down regulated compared to unstimulated cells  
142 identified. We initially assessed the transcriptional dynamics of chromatin modifiers at early  
143 (3-5hrs) and late (24hrs) time points after activation (**Fig. 1A**). Interestingly, we observed  
144 upregulation across the time course of histone methyltransferases, such as *Suv39h1/h2* and  
145 *Ezh2/Suz12* that are associated with deposition of H3K9me3 (Rea et al., 2000) and  
146 H3K27me3 (Cao et al., 2002), respectively. This is in line with recent reports showing that  
147 upregulation of these components are important for optimal effector CD8<sup>+</sup> T cell responses  
148 (Gray et al., 2017; Pace et al., 2018). We also observed that the H3K27me3 demethylase,  
149 *Kdm6b*, was transiently upregulated at 3 and 5hrs but returned to levels observed in naive  
150 CD8<sup>+</sup> T cell levels at 24hrs (**Fig. 1A**). *Kdm6b* was the only one of five histone demethylases  
151 analysed that was transcriptionally upregulated in response to TCR, while *Kdm6a*, another  
152 histone demethylase that is responsible for H3K27me3 removal, was unchanged (**Fig. 1B**).

153

154 **Rapid H3K27me3 demethylation occurs after naive CD8<sup>+</sup> T cell activation.**

155 TCR signalling-induced *Kdm6b* up-regulation coincided with a progressive loss of  
156 H3K27me3 at the promoters of the key transcription factors *Irf4*, *Tbx21* and *Irf8* at 5 and  
157 24hrs after activation, while the levels of H3K4me3 enrichment remained consistent across  
158 these time points (**Fig. 1C**). This progressive loss of H3K27me3 appeared to selective as  
159 H3K27me3 remained largely constant at the promoter of *MyoD* and *Actin* (**Supplementary**  
160 **Figure S1**). Furthermore, the removal of H3K27me3 coincided with concomitant  
161 transcriptional upregulation of these TFs (**Fig. 1D**). These data are consistent with rapid  
162 KDM6b dependent H3K27me3 demethylation initiating transcriptional activation after T cell  
163 stimulation.

164 To identify the genomic regions that underwent rapid H3K27me3 demethylation, we  
165 carried out H3K27me3 ChIP-seq at 3, 5 and 24hrs after naive T cell activation (**Figure 2**).  
166 Consistent with previous reports (Araki et al., 2009; Russ et al., 2014), naive CD8<sup>+</sup> T cells  
167 exhibited broad H3K27me3 regions (**Fig. 2A**). Upon CD8<sup>+</sup> T cell activation, H3K27me3  
168 domains were trimmed significantly, with this remodelling maintained up to 24hrs (**Fig. 2A**).  
169 H3K27me3 demethylation was evident at 7137, 4022 and 13077 regions at 3, 5 and 24hrs,  
170 respectively (**Fig. 2B**), far exceeding the number of regions that had gained H3K27me3 (518,  
171 3641 and 2342 regions, at 3, 5 and 24hrs, respectively) (**Supplementary Figure S2A**). Both  
172 gain and loss in H3K27me3 levels occurred directly at the promoter, the transcription start  
173 site (TSS), exons, 5' UTR and 3' UTR of a gene, with most H3K27me3 changes annotated to  
174 introns, intergenic regions and short interspersed elements (SINEs) (**Supplementary Figure**  
175 **S2B**), indicating the role of H3K27me3 in regulating both protein coding and non-coding  
176 regions.

177 To investigate the dynamics of H3K27me3 demethylation, we classified regions based  
178 on the timing of H3K27me3 removal. We observed that 3428 regions (48%) were transiently  
179 demethylated exhibiting a decrease in H3K27me3 at 3hrs (transient loss). In contrast,

180 relatively few regions (1149, 16.1%) were stably demethylated at all time points measured (3,  
181 5 and 24hrs, stable loss). Of the 13077 regions demethylated at 24hrs, the majority of these  
182 (8443, 65%) only showed demethylation at the 24hr time point (delayed loss) (**Fig. 2B**).  
183 These data are indicative of a staged H3K27me3 demethylation within the first 24hrs of naive  
184 T cell activation. Regions with a “transient”, “stable” and “delayed” gain in H3K27me3 were  
185 also detected but the numbers of these regions were significantly smaller by comparison  
186 (**Supplemental Figure 2A**). Hence, we primarily focused on regions that exhibited  
187 H3K27me3 demethylation early after T cell activation.

188

### 189 **Early H3K27me3 demethylation initiates cellular processes required during effector** 190 **and memory differentiation**

191 To understand how early H3K27me3 demethylation impacted the gene expression  
192 profiles observed in early activated CD8<sup>+</sup> T cells, H3K27me3 demethylated regions were  
193 annotated to nearest neighbouring DEGs ( $\pm 10$ kb). Within early hours of T cell activation, the  
194 majority of the regions exhibiting stable and delayed demethylation were associated with  
195 transcriptionally active genes, rather than down-regulated genes (**Figure 2C**). Importantly,  
196 this association continued to be evident in *ex vivo*-derived effector and memory CD8<sup>+</sup> OT-Is  
197 (**Figure 2C**) indicating that these early changes in H3K27me3 demethylation are associated  
198 with transcriptional upregulation and are transmitted into effector and memory CD8<sup>+</sup> T cells.

199 To better visualise the changes in H3K27me3 deposition for the genes that were  
200 differentially regulated after activation, we generated heat maps showing the tag density  
201 within H3K27me3 peaks ( $\pm 5$ kb from the centre of the peak) annotated to the nearest  
202 neighbouring gene (**Fig. 3A**). Interestingly, regions with that exhibited rapid demethylation  
203 that was stable at the 24hr time point were linked to genes with a well-documented role in T

204 cell biology, such as *Irf4*, *Irf8*, *Tbx21*, *Il10*, *Zeb2*, *Prdm1*, *Atf3*, *Lag3*, *Cd83*, *Ccl1* and cell  
205 cycle processes such as *Nek8* and *Cdkn1a* (**Fig. 3A**).

206 To investigate the potential pathways that are impacted by H3K27me3 demethylation  
207 upon activation, we carried out gene ontology analysis to identify distinct cellular pathways  
208 regulated by distinct H3K27me3 demethylation patterns (**Fig. 3B**). Genes with regions of  
209 transient demethylation were primarily involved in chemokine and cellular migration  
210 processes. Interestingly, gene loci that exhibited stable and/or delayed demethylation were  
211 enriched for general cellular processes such as cell growth, cell morphogenesis, cell adhesion,  
212 proliferation and cell cycle arrest (**Fig. 3B**). These data suggest that early H3K27me3  
213 demethylation upon T cell activation is important for the transcriptional activation of cellular  
214 support processes required for optimal T cell activation and differentiation.

215 To explore this further, we carried out gene ontology of DEGs identified at 3, 5 and 24  
216 hrs after activation in our RNA-seq data. K-means clustering partitioned DEGs into modules  
217 of transcriptionally-induced (sets a-d) or repressed genes (sets e-h) that exhibited distinct  
218 kinetics (**Supplementary Figure S3A, B**). Gene ontology analysis of DEGs that were  
219 upregulated after activation showed distinct functional associations depending on when they  
220 were upregulated. Genes that were rapidly, but transiently upregulated (set a) were enriched  
221 in genes associated with inflammatory and immune response function (**Supplementary**  
222 **Figure S3C**). Genes that were transcribed over the entire time course (sets b, c, 3-24 hrs)  
223 were enriched for cellular support processes such as RNA binding and processing, metabolic  
224 pathways, and cell cycle/proliferation processes (**Supplementary Figure S3C**). Finally,  
225 those genes upregulated at 24hrs only were enriched for DNA repair and cellular division  
226 (**Supplementary Figure S3C**). Taken together, our data demonstrate that naive CD8<sup>+</sup> T cell  
227 activation results in rapid H3K27me3 demethylation resulting in step-wise engagement of

228 transcriptional modules important for readying the activated T cell for subsequent  
229 proliferation and differentiation.

230

231

### 232 **H3K27me3 removal establishes a permissive chromatin landscape for transcription** 233 **factor binding**

234 Having established that H3K27me3 demethylation correlates with transcriptional  
235 activation of key cellular processes upon T cell activation, we sought to understand the  
236 molecular mechanisms that underlie this process. Formaldehyde-Assisted Isolation of  
237 Regulatory Elements (FAIRE)-qPCR and H3 ChIP-qPCR showed T cell activation induced a  
238 loss of H3, and concomitant increase in chromatin accessibility at the *Irf4*, *Tbx21* and *Irf8*  
239 promoters (**Fig. 4A**). To assess the link between increased chromatin accessibility and  
240 H3K27me3 demethylation at a genome-wide scale, we performed ATAC-seq at early and late  
241 activation time points (0, 3 and 24 hrs) and cross-referenced it to the H3K27me3 ChIP-seq  
242 data at the same time points. A significantly higher number of regions (27.5%) that exhibited  
243 stable H3K27me3 loss at 3hr also exhibited an increase in chromatin accessibility compared  
244 to regions with transient or delayed H3K27me3 demethylation (10%). Importantly, regions  
245 that exhibited concomitant H3K27me3 loss and increased chromatin accessibility were  
246 associated with transcriptionally upregulated genes at the same time points (**Supplementary**  
247 **Figure S4**). Importantly, while genes exhibiting demethylation were upregulated, there were  
248 also transcriptional upregulation of genes exhibiting no detectable change in H3K27me3  
249 modification. This may reflect a distinct mechanism for transcriptional regulation.

250 A number of these genomic regions exhibiting chromatin remodelling prior to first cell  
251 division were also observed in mature *ex vivo* effector and memory IAV-specific CTLs  
252 (**Supplementary Figure S4**). These data suggest that early H3K27me3 demethylation upon

253 naive T cell activation results in a profound transition in the chromatin and transcriptional  
254 landscape that is maintained in mature virus-specific effector and memory CTLs.

255

256         Given the link between loss of H3K27me3 and increased chromatin accessibility, we  
257 next assessed which TF binding motifs were enriched at H3K27me3 demethylated regions at  
258 3, 5 and 24 hrs after activation (**Fig. 4C**). Interestingly, in line with the stepwise induction of  
259 specific transcriptional modules at distinct stages of early T cell activation (**Supplementary**  
260 **Figure S3**), we observed staged enrichment for specific TF motifs at 3, 5 and 24hrs after T  
261 cell activation. ATF/JUN motifs were amongst one of the earliest motifs detected at  
262 demethylated regions 3 hours post-activation (**Fig. 4C**). Importantly, the level of ATF/JUN  
263 motif enrichment further intensified up to 24hrs. At 5hrs after activation, TF motifs for REL,  
264 IRFs/STATs/GATA family members emerged at H3K27 demethylated regions with the  
265 appearance of TBX21, RUNX3 and NFIL3 sites at regions demethylated at 24hrs.  
266 Interestingly, motifs for EGR and E2F TFs were only transiently enriched (3hrs) and were  
267 negatively enriched at regions demethylated at 5 and 24hrs after T cell activation. Hence,  
268 dynamic regulation of H3K27 methylation upon naive T cell activation results in ordered  
269 chromatin remodelling events that appear to ready the chromatin landscape for specific TF  
270 binding.

271         To determine whether enrichment of TF motifs at H3K27me3 demethylated sites  
272 corresponded to specific TF binding, regions that exhibited loss or gain of H3K27me3 were  
273 overlaid with publicly available T cell TF ChIP-seq data (**Fig. 4D, E**). Supporting the TF  
274 motif enrichment analysis (**Fig. 4C**), stably demethylated regions in recently activated CD8<sup>+</sup>  
275 T cells were enriched for AP-1 (JUND-14.6%, BATF-15.2%, FOSL2-11.6%) and STAT  
276 (STAT1-13.3%, STAT3-10.2%, STAT5A-11.8%) members, and TBX21 (12.1%) and IRF4  
277 (15.4%) binding compared to either the transiently or delayed groups which ranged between

278 2 and 6% in the same dataset (**Fig. 4D, E**). In contrast, 19.3% of the transiently H3K27  
279 demethylated regions and 17-20% of the regions exhibiting H3K27me3 gain overlapped with  
280 SUZ12 binding, a component of the PRC2 complex that is responsible for H3K27me3  
281 deposition (**Fig. 4D, E**). This suggests that the observed upregulation of PRC2 components,  
282 EZH2 and SUZ12, early after T cell activation may correlate with remethylation of  
283 transiently demethylated regions soon after T cell activation.

284       Importantly, a greater percentage of stably demethylated regions (21.8%) also showed  
285 binding for the histone acetyltransferase, p300 compared to the transient demethylated  
286 regions (8.8%, **Fig. 4D, E**). The potential for p300 binding at these stably demethylated  
287 regions was linked to genes that were transcriptionally induced in effector and/or memory T  
288 cells (**Supplementary Figure S4**). These data suggest that p300 binding and subsequent  
289 acetylation of H3K27 is required for the demethylation to remain stable instead of transient.  
290 To test this, we overlaid our previous H3K27ac data from naïve, effector and memory CD8<sup>+</sup>  
291 T cells (Russ et al., 2017) with transiently, stable and delayed H3K27me3 demethylated  
292 regions. In comparison to the transiently demethylated regions, there was a greater proportion  
293 of the stably demethylated regions that either overlapped (10%) or were within 2kb (25%) or  
294 5kb (38%) of a region with increased H3K27ac in effector T cells (**Fig. 4F**). This trend was  
295 similarly observed in memory T cells albeit at lower percentages (**Fig. 4F**). These  
296 overlapping regions with stable demethylation in early hours of T cell activation and effector  
297 and memory T cells were positioned near differentially expressed genes linked to H3K27Ac<sup>+</sup>  
298 regions (**Supplementary Figure S4**). Together these data support the notion that early  
299 H3K27me3 demethylation enables increased chromatin accessibility and this is further  
300 stabilised by the binding of p300 and subsequent H3K27 acetylation. Hence, within the first  
301 24hrs, remodelling of the chromatin landscape provides a platform enabling binding of T cell

302 specific transcription factors. This provides a molecular basis for engagement of the CD8<sup>+</sup> T  
303 cell proliferation and differentiation program induced by T cell activation.

304

### 305 **Inhibition of H3K27 demethylations limits CD8<sup>+</sup> effector T cell differentiation**

306 To test whether early H3K27me3 demethylation was necessary for induction of  
307 appropriate virus-specific T cell differentiation, we treated naive OT-I CD8<sup>+</sup> T cells with  
308 GSK-J4, a small molecule inhibitor, which binds to the catalytic pocket of KDM6B  
309 (Kruidenier et al., 2012). This was followed by activation with the N4 peptide for 0, 1, 3, 5  
310 and 24 hours (**Fig. 5A**). GSK-J4 inhibition of KDM6B activity prevented the removal of  
311 H3K27me3 across all of the stimulation time points at the *Tbx21*, *Irf4* and *Irf8* promoters,  
312 without affecting pre-existing H3K4me3 levels (**Fig. 5A**). This inhibition of histone  
313 demethylase activity significantly reduced the transcriptional levels of *Tbx21*, *Irf4* and *Irf8*  
314 compared to both mock treated, and OT-I T cells treated with a non-functional analogue  
315 (GSK-J5) (**Fig. 5B**).

316 Given the capacity of GSK-J4 to inhibit early H3K27 demethylation after CD8<sup>+</sup> T cell  
317 activation, we next determined whether GSK-J4 treatment of naive OT-I CD8<sup>+</sup> T cells would  
318 impact virus-specific CD8<sup>+</sup> T cell differentiation. Naive, CellTrace Violet (CTV) labelled  
319 OT-I T cells were treated with the GSK-J4 inhibitor, or GSK-J5 analogue for 4hrs *in vitro*.  
320 An equal number of treated OT-I T cells were then adoptively transferred into recipient B6  
321 mice infected 3 days prior to transfer with the A/HKx31-OVA virus (**Fig. 5C**). Pre-treating  
322 OT-I T cells with either the J5 control or the GSK-J4 inhibitor did not affect the viability of  
323 these cells nor the expression of CD44 or CD62L prior to transfer (**Supplementary Figure.**  
324 **S5**). At 3 days after transfer, both the proportion and absolute number of GSK-J4-treated OT-  
325 I CD8<sup>+</sup> T cells were reduced compared to the mock or GSK-J5 treated OT-I CD8<sup>+</sup> T cells  
326 (**Fig. 5C**). While both mock or J5-treated OT-I T cells had undergone extensive cell division



327 **(Fig. 5D-F)** with an average of 5-6 cell divisions **(Fig. 5F)**, GSK-J4-treated OT-I CD8<sup>+</sup> T  
328 cells had undergone fewer divisions **(Fig. 5F)**. This result complimented our earlier  
329 bioinformatic analysis that indicated that H3K27me3 demethylation was required to engage  
330 gene networks involved in cell division and cell cycling **(Fig. 3D)**. Therefore, the inability to  
331 efficiently demethylate H3K27me3 early after CD8<sup>+</sup> T cell activation resulted in a  
332 diminished capacity to fully engage the proliferative capability of virus-specific CD8<sup>+</sup> T cells  
333 in response to infection.

334 Examination of functional characteristics of the responding OT-I T cells demonstrated  
335 that early H3K27 methylation was also required for acquisition of lineage-specific functions.  
336 For example, GSK-J4 treated OT-I T cells had both a lower proportion of T-BET<sup>+</sup> CD8<sup>+</sup> T  
337 cells and expressed lower levels of T-BET and GATA3 within positive cells  
338 **(Supplementary Figure. S6A, B)**. Interestingly, there was a lower proportion of GSK-J4  
339 treated OT-I T cells located within the draining lymph node producing IL-2, IFN- $\gamma$  or TNF  
340 upon reactivation, compared to mock treated and GSK-J5 treated cells **(Supplementary**  
341 **Figure S6C-E)**. This was also reflected in a diminished proportion of multifunctional OT-I T  
342 cells isolated from the draining lymph node capable of simultaneously producing all three  
343 cytokines **(Supplementary Figure S6F-G)**. Importantly, there was no difference in the  
344 amount of cytokine produced. These data support early reports showing that acquisition of  
345 CD8<sup>+</sup> T cell effector function is linked to cellular division (Denton et al., 2011; Lawrence and  
346 Braciale, 2004). Hence, H3K27 demethylation, prior to initial cell division, appears to be a  
347 critical step for initiation of the autonomous CD8<sup>+</sup> T cell differentiation program induced by  
348 T cell activation.

349

350 **H3K27me3 removal is required for establishing virus-specific CD8<sup>+</sup> T cell memory**

351           It has previously been demonstrated that diminished effector responses can still lead to  
352 effective CD8<sup>+</sup> T cell memory populations (Badovinac et al., 2004; Zehn et al., 2009). We  
353 therefore next examined whether CD8<sup>+</sup> T cell memory T cell formation was left intact after  
354 inhibition of KDM6B-dependent H3K27me3 demethylation prior to initial activation. Naive  
355 OT-I CD8<sup>+</sup> T cells treated with either the GSK-J5 analogue, or the GSK-J4 drug, and were  
356 adoptively transferred into B6 recipient mice that had been infected with A/HKx31-OVA one  
357 day prior. The primary and secondary OT-I responses were then assessed at the peak of the  
358 primary response (day 10), memory (day 30) or after secondary challenge with A/PR8-OVA  
359 (day 6, secondary) (**Fig. 6A**). In support of our earlier data, GSK-J4 treatment had a profound  
360 impact on the expansion of OT-I CD8<sup>+</sup> T cells optimal during the primary acute effector  
361 response. The diminished primary response observed after GSK-J4 treatment of OT-I CD8<sup>+</sup> T  
362 cells was also reflected in the establishment of a lower memory OT-I cell frequency in the  
363 spleen (**Fig. 6B**). Comparison of OT-I CD8<sup>+</sup> T cell numbers in the lung tissue 30 days after  
364 primary infection demonstrated that GSK-J4 treatment prior to adoptive transfer resulted in a  
365 significantly reduced frequency and number of total memory OT-I CD8<sup>+</sup> T cells (**Fig. 6C**).  
366 Utilising intravital injection of anti-CD3 antibody to distinguish resident versus circulating  
367 memory CTL, we determined that GSK-J4 treatment also resulted in fewer tissue resident  
368 CD69<sup>+</sup>CD103<sup>+</sup> memory OT-I cells (**Fig. 6D**). Thus it appears that inhibition of H3K27me3  
369 demethylation impacted the formation of effector and memory CTL populations.

370           It has been previously demonstrated that limiting initial effector T cell expansion does  
371 not necessarily impact the recall capacity of memory CD8<sup>+</sup> T cells (Zehn et al., 2009). To  
372 determine whether inhibiting H3K27me3 demethylation also impacted the recall capacity of  
373 established memory OT-I, we secondarily challenged primarily infected mice that had  
374 received GSK-J4-, J5- or mock treated OT-I cells with a serologically distinct A/PR8 strain of  
375 IAV-OVA (**Fig. 6B, E**). Memory OT-I T cells established after transfer and primary

376 activation of GSK-J4-treated OT-Is failed to expand upon secondary infection. This was  
377 evident in the spleen (**Fig. 6B**), the bronchoalveolar lavage fluid (BAL) and mLN (**Fig. 6E**).  
378 Together these data suggest that a failure to remove H3K27me3 early after activation not  
379 only impacts initial T cell expansion, but also programming of memory recall potential. This  
380 was likely not due to a difference in starting memory T cell number as the fold expansion in  
381 GSK-J4 treated mice was significantly diminished compared to the GSK-J5 controls. This  
382 indicates an intrinsic defect in recall capacity.

383 To further consolidate our finding that KDM6B plays a role in programming optimal CD8<sup>+</sup> T  
384 cell memory, we utilised transgenic mice that constitutively express a *Kdm6b*-specific  
385 shRNA, for constitutive knockdown of *Kdm6b* (Prier et al., 2019a). The mice express  
386 *Kdm6b* mRNA as part of a GFP reporter where the levels of GFP are indicative of shRNA  
387 levels (Prier et al., 2019a). Expression of the *Kdm6b* shRNA knocked down *Kdm6b*  
388 transcription by ~50% in naïve CD8<sup>+</sup> T cells compared to the luciferase shRNA control  
389 (**Supplementary Figure S8**). *Kdm6b* shRNA mice were infected with A/HKx31 and  
390 memory D<sup>b</sup>NP<sub>366</sub> and D<sup>b</sup>PA<sub>224</sub>-specific CD8<sup>+</sup> T cell responses analysed in the spleen 30 days  
391 after infection. *Kdm6b* knockdown in GFP<sup>hi</sup> CD8<sup>+</sup> T cells resulted in a diminished number of  
392 IAV-specific memory CD8<sup>+</sup> T cells compared to the luciferase shRNA knockdown controls  
393 (**Fig. 6F**). This diminished response was reflected in lower proportion of both effector (T<sub>EM</sub>)  
394 and central (T<sub>CM</sub>) memory subsets. Altogether, both of these experimental models  
395 demonstrate that inhibition of KDM6B, and subsequent H3K27me3 demethylation during  
396 early T cell activation, is critical for facilitating not just mature primary virus-specific CD8<sup>+</sup>  
397 T cell expansion, but formation of functional virus-specific memory CD8<sup>+</sup> T cells.

398

399

## 400 DISCUSSION

401 Naive CD8<sup>+</sup> T cell activation results in an autonomous program of cellular proliferation  
402 that results in the acquisition of lineage-specific function (Kaech and Ahmed, 2001; van  
403 Stipdonk et al., 2003). While the virus-specific CD8<sup>+</sup> T cell differentiation process is highly  
404 controlled and regulated (Cruz-Guilloty et al., 2009; Intlekofer et al., 2005; Kallies et al.,  
405 2009; Marchingo et al., 2014; Schlub et al., 2009; Xin et al., 2016), while triggering CD8<sup>+</sup> T  
406 cell proliferation only requires a short stimulus (Kaech and Ahmed, 2001), at least 20 hrs of  
407 stimulus is required for functional CD8<sup>+</sup> T cell expansion . Our study provides molecular  
408 evidence that initial T cell activation results in rapid KDM6B dependent removal of  
409 H3K27me3 enabling engagement of transcriptional pathways required for preparing T cells  
410 for subsequent proliferation and differentiation. KDM6B-dependent removal of H3K27me3  
411 enables increased chromatin accessibility and the staged exposure of specific TFBSs within  
412 gene regulatory elements. This is associated with subsequent histone acetylation and stable  
413 transmission of transcriptionally permissive chromatin structures into effector and memory  
414 CTL populations. An inability to appropriately engage these cellular support processes prior  
415 to first cell division negatively impacts subsequent optimal differentiation of virus-specific  
416 CTL and establishment of virus-specific CD8<sup>+</sup> T cell memory.

417 It is now well accepted that genome wide changes in chromatin accessibility and post-  
418 translational histone modifications are associated with the transition of naive T cell  
419 differentiation into the effector/memory states (Denton et al., 2011; Northrop et al., 2008;  
420 Russ et al., 2014; Russ et al., 2017; Scott-Browne et al., 2016; Sen et al., 2016; Wei et al.,  
421 2009; Zediak et al., 2011). It has been demonstrated that dynamic modulation of H3K27me3  
422 deposition is evident during thymic T cell development (Zhang et al., 2012). In this study,  
423 we demonstrated that TCR engagement specifically up-regulated *Kdm6b* transcription, and  
424 not *Kdm6a*, which is another H3K27me3 demethylase. This differential H3K27me3

425 demethylase upregulation after TCR activation potentially explains the observation that  
426 virus-specific effector and memory CD8<sup>+</sup> T cell generation is normal in *Kdm6a* knockout  
427 mice (Cook et al., 2015; Yamada et al., 2019). Interestingly, T cell specific *Kdm6a*-  
428 deficiency did restrict LCMV-specific T follicular CD4<sup>+</sup> T cell responses, leading to  
429 increased susceptibility (Cook et al., 2015). This may point to distinct roles for KDM6A and  
430 KDM6B in CD4<sup>+</sup> and CD8<sup>+</sup> T cell responses, respectively.

431         Interestingly, concurrent with KDM6B upregulation, we saw upregulation of the  
432 PRC2 H3K27me3 methyltransferase subunits, *Ezh2* and *Suz12*. This raises an interesting  
433 question about how recently activated CD8<sup>+</sup> T cells initiate appropriate gene transcription  
434 when there is active competition between enzymes that write or erase H3K27me3. Our  
435 comprehensive profiling of H3K27me3 deposition in early-activated and *ex vivo*  
436 differentiated effector and memory T cells showed that regions that exhibited either delayed  
437 or stably-maintained H3K27me3 demethylation were associated with an initial permissive  
438 chromatin state that was consolidated by H3K27Ac<sup>+</sup> enrichment and chromatin accessibility.  
439 Importantly, these regions exhibited significant overlap with publicly available ChIP-seq data  
440 identifying regions in activated T cells bound by the histone acetyltransferase, P300. In  
441 contrast, regions that showed transient H3K27me3 demethylation, overlapped with regions  
442 that were targets for the PRC2 subunit, SUZ12. It is tempting to speculate that a rapid  
443 transition from methylation to acetylation at H3K27 acts a molecular switch that ensures  
444 activation of stable gene transcription required for optimal T cell differentiation and  
445 proliferation. This then protects activated gene loci from the activity of opposing chromatin  
446 modifiers ensuring stability of differentiation state.

447         A recent study showed that EZH2 activity and H3K27me3 deposition, during the late  
448 effector T cell response, is required to repress pro-memory genes ensuring virus-specific  
449 CD8<sup>+</sup> effector T cell generation (Gray et al., 2017). Interestingly, a similar study

450 demonstrated that *Ezh2* upregulation within virus-specific CD8<sup>+</sup> T cells that had undergone  
451 one cell division marked T cells committed to become effector T cells (Kakaradov et al.,  
452 2017). Our data suggest that such fate decisions may be made even prior to the first cell  
453 division as upregulation of *Ezh2* was observed at 3, 5 and 24hrs after activation.

454 Analysis of genomic regions that lost H3K27me3 and became more accessible over  
455 the time course, demonstrated staged exposure of specific TFBS before initial cell division.  
456 BATF/JUN binding sites emerged first, followed by STATs/IRF/NFAT/NFκB site, and  
457 finally TBX/RUNX sites at 24 hrs after activation. The initial unmasking of regions  
458 containing BATF/JUN family binding sites fits with earlier observations that BATF acts as  
459 an important factor for initiation of CD8<sup>+</sup> T cell activation (Godec et al., 2015; Kurachi et al.,  
460 2014). Importantly, studies to date narrowed the timing of BATF activity to somewhere  
461 within the first 3 days after CD8<sup>+</sup> T cell activation (Godec et al., 2015). Our data  
462 demonstrate that BATF activity is likely required in the very initial stages of T cell  
463 activation, and when paired with its binding partners (such as IRF4), it could potentially act  
464 as a pioneering factor helping remodel the chromatin landscape within hours of activation.  
465 Whether KDM6B recruitment is dependent on BATF, or if H3K27me3 removal at target  
466 gene loci precedes BATF binding to initiate T cell activation will be of interest to examine in  
467 the future.

468 KDM6B dependent removal of H3K27me3 was evident at the *Tbx21* locus as early as  
469 3hrs, and stable up to 24hrs after activation. This correlated with rapid upregulation of *Tbx21*  
470 transcription prior to cell division. T-BET upregulation was prior to the emergence of TBX21  
471 binding sites within H3K27 demethylated regions found at 24 hours after activation. We have  
472 recently shown that T-BET deficiency results in early dysregulation of virus-specific CD8<sup>+</sup> T  
473 cell differentiation that results in an inability to expand (Prier et al., 2019b). This was  
474 associated with decreased H3 acetylation at a T-BET target transcriptional enhancer within

475 the *Ifng* locus. It has been previously demonstrated that T-BET can physically interact with,  
476 and recruit H3K27 demethylases to the *Ifng* regulatory elements in CD4<sup>+</sup> T<sub>H</sub>1 cells (Miller et  
477 al., 2008). Hence, we hypothesise that T-BET works downstream of pioneering factors such  
478 as BATF/IRF4/RUNX3, by targeting CD8<sup>+</sup> T cell specific gene loci to further modulate  
479 chromatin remodelling. These results are reminiscent of a mechanism observed in stem cell  
480 differentiation where early H3K27me3 removal, after receipt of differentiation signals,  
481 enables binding of lineage-specifying TFs to newly remodelled chromatin structures and  
482 commitment to a differentiated cell fate (Agger et al., 2007).

483 Inhibition of KDM6B activity prior to T cell activation had a profound impact on  
484 subsequent virus-specific CD8<sup>+</sup> T cell proliferation, and the capacity to establish an effector  
485 memory T cell pool. Naive CD8<sup>+</sup> OT-I T cell treatment with the KDM6B inhibitor prior to  
486 adoptive transfer severely impacted the proliferative capacity of OT-I T cells responding to  
487 IAV infection. Despite the drug likely being diluted upon subsequent cell division, GSK-J4  
488 treated OT-I CD8<sup>+</sup> T cells exhibited delayed division kinetics and failed to fully expand to  
489 levels observed in control treated cells. This suggests that early H3K27me3 removal is of  
490 critical importance for subsequent clonal expansion and differentiation. Concomitant with  
491 diminished proliferation in the lymph node, we observed that GSK-J4 OT-I CD8<sup>+</sup> T cells  
492 exhibited lower levels of T-BET expression and a lower proportion expressing multiple  
493 cytokines. These data further support the idea that molecular re-programming in the lymph  
494 node during the early stages of T cell activation is a key step for optimal effector T cell  
495 differentiation.

496 Deposition of H3K27me3 at key pro-memory genes has been reported to be important  
497 for the formation of optimal effector virus-specific T cell responses (Gray et al., 2017;  
498 Kakaradov et al., 2017). Similarly, it has also been recently shown that deposition of another  
499 repressive histone mark, H3K9me3, was required for shutting down pro-memory gene loci

500 enabling optimal effector CD8<sup>+</sup> T cell differentiation (Pace et al., 2018). Further, limiting T  
501 cell proliferation has also been observed to promote formation of memory CD8<sup>+</sup> T cell  
502 populations (Badovinac et al., 2005; Badovinac et al., 2004; Zehn et al., 2009). This is  
503 supported by the notion that effector CTL are more terminally differentiated compared to  
504 memory CTL that maintain self-renewal capacity (Crompton et al., 2016). Hence, it was  
505 possible that inhibition of H3K27me3 removal would help promote memory formation.  
506 GSK-J4 treated OT-I CD8<sup>+</sup> T cells exhibited an intrinsic failure to expand upon secondary  
507 IAV challenge. In particular, we observed profound defects in the formation of lung resident  
508 CD8<sup>+</sup> memory OT-Is (T<sub>RM</sub>). Hence, KDM6B dependent H3K27me3 demethylation during  
509 the early stages of a primary T cell response impacts efficient programming of both effector  
510 and memory CD8<sup>+</sup> T cell fates. This data also suggests that commitment to effector and  
511 memory T cell fates are independent processes. This might reflect the role of distinct TFs.  
512 For example, we observed sequential unmasking of specific TF motifs for EOMES and  
513 RUNX3 TFs that have been shown to alter CD8<sup>+</sup> T cell differential potential for the  
514 formation of distinct memory T cell subsets (Mackay et al., 2015; Miller et al., 2008; Milner  
515 et al., 2017; Wang et al., 2018). By regulating the accessibility of these T cell lineage TF  
516 motifs during early hours of T cell activation, H3K27me3 demethylation therefore regulates  
517 the timely commitment to both effector and memory T cell fates.



518 **Acknowledgements**

519 This work was supported by grants from the National Health and Medical Research Council  
520 of Australia (Program Grant #5671222 awarded to awarded to SJT and NLL; Project grant  
521 #APP1003131 awarded to S.J.T); and an Australian Research Council Discovery Grant (DP  
522 DP170102020 awarded to S.J.T and S.R); S.J.T is supported by an NHMRC Principal  
523 Research Fellowship; NLL is supported by an Australian Research Council Future  
524 Fellowship. We thank the Monash Genomics Platform (Micromon) for high throughput  
525 sequencing and the Monash Bioinformatics Platform for data analysis.

526

527

528 **Author Contributions:** Conceptualisation, S.J.T, J.L. and S.R. Methodology, J.L, K. H,  
529 M.O., L.J.G, X.Y.X.S, and A.B. Formal analysis, J.L., K.H., M.O., L.J.G., and X.Y.X.S.  
530 Investigation, J.L, J.E.P, X.Y.X.S., M.L.T.N., D.P., and B.R. Resources, S.J.T, S.R and  
531 P.J.H. Data Curation, K. H., M.O. and L.J.G. Writing original draft, S.J.T and J.L; Writing-  
532 Review and Editing, S.J.T, J.L., N.L.L, K.H., B.R. and S.R. Supervision, S.J.T. Acquisition  
533 of funding, S.J.T., P. J. H., N.L.G and S.R.  
534

535 **Declaration of interests:**

536 S.R is currently the Founder/Chief Scientific Officer of EpiAxis Therapeutics. This  
537 manuscript received no funding from EpiAxis for this work. S.J.T is a member of the  
538 scientific advisory board for Medicago Inc, Quebec, Canada. This manuscript received no  
539 funding from Medicago for this work.

540

541

542 **FIGURE LEGENDS**

543 **Figure 1. The regulation of Kdm6b and H3K27me3 demethylation during early hours**

544 **of T cell activation. A)** Naïve (CD44<sup>lo</sup>CD62L<sup>hi</sup>) CD45.1<sup>+</sup> CD8<sup>+</sup> OT-I CTLs were sort

545 purified in and RNA-seq analysis carried on naive CD8<sup>+</sup> OT-I T cells, or after *in vitro*

546 stimulation with the N4 peptide in the presence of rhIL-2 (10U/mL) for 3, 5 and 24 hours.

547 Expression fold change (log<sub>2</sub>) of histone modifiers by RNA-seq in activated CD8<sup>+</sup> T cells

548 was compared to unstimulated OT-I naïve CD8<sup>+</sup> T cells. **B)** Relative gene transcription

549 levels of *Kdm1b*, *Kdm3b*, *Kdm5b*, *Kdm6a* and *Kdm6b* were validated by qPCR. **C)** Relative

550 enrichment of H3K27me3 measured by ChIP-qPCR using primers spanning across the

551 promoter of *Irf4*, *Tbx21* and *Irf8* gene loci in OT-I CD8<sup>+</sup> T cells stimulated up to 2hrs in

552 10U/mL of rhIL-2 with the 1 µg N4 peptide *in vitro*. **D)** Relative gene transcription measured

553 by real time qPCR validated the transcriptional pattern of the transcription factors, *Tbx21*

554 (encodes T-BET), *Irf4* (IRF4) and *Irf8* (IRF8) in OT-I naïve CD8<sup>+</sup> T cells stimulated as

555 described above. Data are shown as mean ± SEM from 3 independent repeats. Data are

556 shown as mean ± SEM from 3 independent repeats with statistical significance calculated

557 using a one-tailed Student's T-test (\*p<0.05 \*\*p<0.01, \*\*\*p<0.001).

558

559 **Figure 2. Dynamic regulation of H3K27me3 during early CD8<sup>+</sup> T cell activation. A)**

560 H3K27me3 ChIP-seq was performed on either naive CD8<sup>+</sup> OT-I T cells, or on OT-I T cells

561 after 3, 5, or 24 hrs of *in vitro* stimulation as described above in Figure 1. Data was mapped

562 back to the mouse genome (version mm10). H3K27me3 domain length was assessed within

563 regions that exhibited loss of H3K27me3 within activated CD8<sup>+</sup> T cells compared to naive

564 CD8<sup>+</sup> T cells. **B)** Genomic regions that marked with H3K27me3 within OT-I CD8<sup>+</sup> T cells

565 activated for 3, 5 and 24hrs were enumerated and compared to H3K27me3 regions within

566 unstimulated naive OT-I T cells. Genomic regions exhibiting H3K27me3 loss only after 3hrs

567 of stimulation were characterised as “transient” loss; decreased H3K27me3 at 3, 5 and 24hrs  
568 of stimulation were “stable” loss and decreased H3K27me3 at 24hrs only after stimulation as  
569 “delayed” loss. **C)** H3K27me3 ChIP-seq was performed on either naive CD8<sup>+</sup> OT-I T cells,  
570 or on OT-I T cells simulated as described above in Figure 1. Data was mapped back to the  
571 mouse genome (version mm10). Genomic regions that either lost or gained H3K27me3  
572 within activated CD8<sup>+</sup> OT-I T cells were compared to the unstimulated sample. These  
573 regions were categorised into either “transient”, “delayed” or “stable” loss or gain of  
574 H3K27me3. The number of regions in the groups of “transient”, “stable”, “delayed”  
575 H3K27me3 loss and gain were within either 1000, 5000 and 10,000 base pairs (bp) of the  
576 transcription start site of differentially expressed genes identified after in vitro activation (see  
577 Figure 1) or identified after 5 hrs stimulation of *ex vivo*-derived effector OT-I CD8<sup>+</sup> T cells  
578 (Russ et al., 2014).

579

580 **Figure 3. H3K27me3 demethylation regulates genes involved in cellular support**  
581 **processes.** **A)** The total number of H3K27me3 sequence tags within  $\pm$  5 kb of the middle of  
582 the peak was transformed (log<sub>2</sub>) and converted into a heatmap according to (Russ et al.,  
583 2014). Hierarchical clustering was then used to identify genomic regions that exhibited  
584 similar patterns of transient, stable or delayed H3K27me3 loss. These regions were then  
585 annotated to nearest neighbour genes (listed). **B)** Gene Ontology (GO) analysis of annotated  
586 gene loci linked to H3K27me3 regions exhibiting “transient”, “stable” or “delayed” loss of  
587 H3K27me3 was carried out and hierarchical clustering based on p value carried out.

588

589 **Figure 4. Stable H3K27me3 removal at genomic regions targeted by T cell specific TFs.**  
590 **A)** Naive OT-I CD8<sup>+</sup> T cells were activated as previously described above. Changes in  
591 chromatin accessibility was assessed by FAIRE-qPCR and H3 histone ChIP using qPCR and

592 primers specific the *Irf4*, *Tbx21* and *Irf8* promoters. Data are shown as mean  $\pm$  SEM from 3  
593 independent repeats with statistical significance calculated using a one-tailed Student's T-test  
594 (\* $p < 0.05$  \*\* $p < 0.01$ , \*\*\* $p < 0.001$ ). **B**) Genome wide changes in chromatin accessibility was  
595 assessed by ATAC-Seq on either naive OT-I CD8<sup>+</sup> T cells, or activated for 3 and 24hrs.  
596 Shown is the proportion (%) of regions exhibiting distinct H3K27me3 demethylation  
597 dynamics that either directly overlapped or were positioned within 2 to 5kb to the centre of  
598 called ATAC-seq peaks. Significantly higher percentage of regions with stable demethylation  
599 overlapped or were within <5kb of a chromatin accessible region at 3hr and 24hr than those  
600 with transient or delayed demethylation (\*\*\*  $p < 2.2e-16$ ). **C**) Prediction of transcription factor  
601 binding sites within H3K27me3 demethylated regions was carried out using the CiiDER  
602 algorithm (Gearing et al., 2019; Russ et al., 2017). Shown is a t-SNE plot displaying  
603 transcription factor motif enrichment ( $\log_2$ ) within H3K27me3 demethylated regions at 3, 5  
604 and 24hrs after T cell activation compared to H3K27me3 methylated regions common to all  
605 time points (0, 3, 5 and 24hrs). Red circles represent highly enriched TFBS, blue circles  
606 represent TFBS that are under-represented. Open circles represent significantly enriched TF  
607 motifs that are present in at least 15% of gene loci **D**) Publicly available TF ChIP-seq data for  
608 TFs identified to have significantly enriched TFBS (**Fig. 4C**) were downloaded from GEO  
609 data sets. The data was mapped to regions exhibiting “transient”, “stable” or “delayed”  
610 H3K27me3 demethylation and the percentage (%) of regions exhibiting overlap of TF  
611 binding with either H3K27me3 demethylation, or H3K27me3 gain determined. “\*” indicates  
612 significantly greater binding percentages compared to all H3K27me3 enriched regions at 0hr  
613 ( $p < 0.01$ ). **E**) The percentage of genomic regions exhibiting overlap in transcription factor  
614 binding in either stable or transient H3K27me3 demethylation were compared. Highlighted  
615 in red is publicly available TF ChIP-seq data derived from T cell populations, while TF  
616 binding data from other cell types are represented in grey. Gene loci exhibiting significant

617 binding to stable regions or transient regions are named. **F)** The proportion (%) of genomic  
618 regions identified to exhibit H3K27me3 demethylation that also overlapped (within 0 to 5kb)  
619 to a regions that exhibited H3K27Ac gain within effector or memory OT-I CD8<sup>+</sup> T cells  
620 (Russ et al., 2014) is shown. A significantly higher proportion of regions with stable  
621 demethylation overlapped or were within <5kb to a H3K27Ac enriched region in effector (\*  
622 p<2.2e-16) and memory (\*\* p<6.5e-5) OT-I CD8<sup>+</sup> T cells than those with transient or  
623 delayed demethylation.

624

625 **Figure 5. KDM6B inhibition prior to first cell division impairs CD8<sup>+</sup> T cell expansion in**  
626 **response to activation. A)** Sort purified OT-I naïve CD44<sup>int/lo</sup> CD62L<sup>hi</sup> CD8<sup>+</sup> T cells were  
627 either left untreated (mock) or treated with 10µM of the J5 control and J4 inhibitor for 2hrs in  
628 the presence of IL-2 before activating with the N4 peptide for 0, 1, 3, 5 and 24 hours. Cells  
629 were then processed for ChIP-qPCR analysis for H3K27me3 and H3K4me3 at the promoters  
630 of *Tbx21*, *Irf4* and *Irf8*. Data is representative of 2 independent repeats. **B)** The same samples  
631 were also used to assess transcriptional regulation of *Tbx21*, *Irf4*, *Irf8* and *Tnf* using  
632 quantitative PCR. Data shown are mean ± SEM from 3 independent repeats. Statistical  
633 significance was calculated using 2 way-ANOVA (J4 vs. mock and/or J5 control, \*p<0.05  
634 \*\*p<0.01, \*\*\*p<0.001). **C)** *In vivo* analysis of KDM6B inhibition on IAV-specific CD8<sup>+</sup> T  
635 cell responses. CTV labelled OT-I CD8<sup>+</sup> T cells were untreated (mock) or treated with GSK-  
636 J5 or GSK-J4 for 4hrs prior to adoptive transfer into C57BL/6 recipients, previously infected  
637 3 days before with 10<sup>4</sup> pfu X31-OVA. The proportion and number of CD45.1<sup>+</sup>/CD8<sup>+</sup> OT-I T  
638 cells detected in the spleen (SPN), mediastinal lymph node (mLN) and the bronchoalveolar  
639 lavage (BAL) fluid were assessed by flow cytometry. **D)** The percentage and number of OT-I  
640 CD45.1<sup>+</sup>/CD8<sup>+</sup> T cells undergoing different number of cell divisions was assessed. **E)**  
641 Representative FACS plot comparing the frequency of dividing OT-I CD45.1<sup>+</sup>/CD8<sup>+</sup> T cells

642 with mock, J5 or J4 treatment. **F)** The average number of cell divisions of CD45.1<sup>+</sup> OT-I  
643 CD8<sup>+</sup> T cells were compared between mock, J5 and J4 conditions. Data shown are mean ±  
644 SEM with 4-5 mice/group and are representative of 2 independent repeats. Statistical  
645 significance calculated using a two-tailed Student's T-test (\*p<0.05 \*\*p<0.01, \*\*\*p<0.001).

646

647 **Figure 6. Antigen-specific memory formation requires H3K27me3 removal during early**

648 **CD8<sup>+</sup> T cell activation.** **A)** OT-I CD8<sup>+</sup> T cells that were either mock treated, or treated with

649 GSK-J5 or GSK-J4 for 4hrs prior, were adoptively transferred into C57BL/6 recipients

650 infected with 10<sup>4</sup> pfu X31-OVA a day before (1<sup>o</sup> response). Mice were rested for 30 days

651 before re-challenge with 10<sup>4</sup> pfu PR8-OVA (2<sup>o</sup> response). **B)** The proportion and number of

652 CD45.1<sup>+</sup>CD8<sup>+</sup> OT-I T cells were enumerated in the spleen of mice on day 10 and 30 post-

653 transfer and again 6 days post-secondary challenge with PR8-OVA. These were compared

654 between the mock, J5 and J4 treatment. Data shown are mean ± SEM with 4-5 mice/group

655 and are representative of 2 independent repeats. **C)** The proportion and the number of

656 memory CD45.1<sup>+</sup>CD8<sup>+</sup> OT-I T cells were enumerated in the lungs of mice 30 days post

657 primary infection with X31-OVA. **D)** Representative FACS plot of CD45.1<sup>+</sup>CD8<sup>+</sup> resident

658 memory T cells (CD69<sup>hi</sup>CD103<sup>hi</sup>) identified in the lungs mice that received CD8<sup>+</sup> OT-I T

659 cells that received mock, GSK-J5 or GSK-J4 treatment. The proportion and number of mock,

660 GSK-J5 or GSK-J4 treated CD45.1<sup>+</sup>CD8<sup>+</sup> Trm cells were compared. Data shown are mean ±

661 SEM with 4-5 mice/group and are representative of 2 independent repeats. **E)** The proportion

662 and number of mock, GSK-J5 or GSK-J4 treated memory CD45.1<sup>+</sup>CD8<sup>+</sup> OT-I T cells were

663 enumerated in the BAL and mLN from mice that were challenged with PR8-OVA. Data

664 shown are mean ± SEM with 4-5 mice/group and are representative of 2 independent repeats.

665 **F)** The number of IAV-specific (D<sup>b</sup>PA<sub>224</sub> and D<sup>b</sup>NP<sub>366</sub>) CD8<sup>+</sup> T cells quantified in the spleen

666 in VAV-tTA Lc1309 (control) and VAV-tTA Kdm6B shRNA mice 30 d.p.i. with 10<sup>4</sup> pfu



667 X31. The number of IAV-specific CD8<sup>+</sup> T cells compared between GFP (shRNA) high  
668 versus low cells between the control and Kdm6b shRNA expressing mouse strains. The  
669 number of IAV-specific Tem and Tcm CD8<sup>+</sup> T cells were compared between the control and  
670 Kdm6b shRNA expressing mouse strains. Data shown are mean  $\pm$  SEM with 4-5  
671 mice/group. All statistical significance shown here were calculated using a two-tailed  
672 Student's T-test (\*p<0.05 \*\*p<0.01, \*\*\*p<0.001).

673

674

675 **STAR METHODS**

676 ***Cell preparation***

677 Naïve OT-I CD8<sup>+</sup>CD44<sup>lo/int</sup> cells were purified from OT-I/Ly5.1 male mice (6-8 weeks)  
678 (>99% purity). They were stimulated with 1µM OVA (N4) for 0, 1, 3, 5 and 24 hours at the  
679 presence of rhIL-2 (10U/mL) in cRMPI. For demethylase inhibition, purified OT-I CD8<sup>+</sup> T  
680 cells were pre-treated with 10µM of the control inhibitor (J5) or the Kdm6b inhibitor (J4) for  
681 2hrs in cRPMI with rhIL-2 (10U/mL) before stimulation with the N4 peptide for 0, 1, 3, 5  
682 and 24 hours.

683

684 ***In Vivo Histone Demethylase Inhibition***

685 Total lymph nodes were extracted from OT-I females (6-10 weeks). They were resuspended  
686 to generate a single cell suspension followed by labelling with the CellTrace Violet Cell  
687 Proliferation kit. A total of 4x10<sup>6</sup> lymphocytes were used for either the mock treatment or  
688 pretreatment with either the substrate specificity control (J5) or the H3K27me3 demethylase  
689 inhibitor (J4) in rhIL-2 (10U/mL) for 4hrs. A portion of these cells were used to stain with  
690 the Annexin V kit with PI and anti-CD44-PE-Cy7, CD62L-BV570, CD8-APC and CD45.1-  
691 PE antibodies. A proportion of 3x10<sup>5</sup> naïve (CD44<sup>int/lo</sup>CD62L<sup>hi</sup>) CD8<sup>+</sup> cells were then  
692 intravenously injected into female C57BL/6 mice (6-8 weeks) that had been infected with  
693 10<sup>4</sup>pfu x31-OVA for 3 days (early time point) or 10<sup>4</sup> naïve (CD44<sup>int/lo</sup>CD62L<sup>hi</sup>) CD8<sup>+</sup> cells  
694 were used for determining early memory formation at day 30 post-infection. At these time  
695 points, the spleen (SPN), mediastinal lymph nodes (mLN)and bronchoalveolar lavage (BAL)  
696 fluid or the lungs were extracted to prepare for single cell suspension. This was followed by  
697 staining with the live/dead aqua-blue dye, anti-CD45.1, CD45.2, CD8, Gata3, T-bet, IFN-g,  
698 IL-2, TNF antibodies for flow cytometric analysis.

699

700 ***Flow Cytometry***

701 For flow cytometry analysis, antibody-stained samples were acquired on then FACSCanto II  
702 or the Fortessa flow cytometers (BD Biosciences) coupled to the high through system (HTS).  
703 Post-acquisition data analyses were performed using FlowJo software (Tree Star, Ashland,  
704 OR, USA). Mean fluorescence intensity (MFI) or the frequency (%) of staining was  
705 determined as the geometric mean of positive population.

706

707 ***Total RNA extraction***

708 Total RNA was extracted using Trizol® from unstimulated or stimulated OT-I CD8<sup>+</sup> T cells.  
709 For gene expression analysis, 100µg mRNA was converted to cDNA using the Omniscript kit  
710 (Invitrogen) according to manufacturer's instructions. Relative gene expression changes were  
711 determined by quantitative real time-PCR using the CFX-Connect Real-Time System  
712 (Biorad) with Taqman ® Gene MGB primer/probes (Life Technologies).

713

714 ***RNA-sequencing***

715 RNA samples (triplicates) were depleted of DNA and purified using the Qiagen RNeasy  
716 MinElute kit. The bioanalyzer was used to determine the integrity of the RNA before library  
717 preparation using the kit. RNA libraries were sequenced paired end (100bp) on the  
718 Hiseq2000 instrument at the Australian Genome Research Facility, the Walter and Eliza Hall  
719 Institute of Medical Research, Melbourne, Australia. Data quality was confirmed with fastqc  
720 software. Paired end RNA-seq data was mapped to mouse genome mm10 using TopHat (with  
721 Bowtie2). Only concordant pairs with mapping quality greater than 10 were utilised. Reads  
722 were assigned to annotated genes using Feature Counts from R subread Bioconductor R  
723 package. Genes which did not have at least 3 counts in each sample in at least one group were  
724 excluded from the analysis. Differential Expression analysis was done using edgeR

725 Bioconductor R package. Genes were considered DE if exhibited  $FDR < 0.05$  and  $\log_2 FC >$   
726 1. Log averages of the triplicates for the differential genes were clustered using Manhattan  
727 distance, complete linkage (R) and grouped using the z-score of the averaged TMM  
728 normalized values (EdgeR) with K means (R).

729

### 730 ***Chromatin Immuno-precipitation (ChIP) and Formaldehyde-assisted Isolation of*** 731 ***Regulatory Element (FAIRE) Assays***

732 Cells crosslinked with 0.6% formaldehyde were sonicated and immune-precipitated with  
733 anti-H3K4me3 and H3K27me3 ChIP-grade antibodies and Protein A magnetic beads  
734 (Millipore). Total input and no-antibody control for each sample was included for  
735 normalisation and specificity control purposes. Immuno-precipitated DNA was purified and  
736 re-suspended in 0.1X TE buffer. For FAIRE-analysis, open chromatin was extracted twice by  
737 adding an equal volume of phenol:chloroform:isoamyl (25:24:1) (Sigma) and precipitated as  
738 described for ChIP assays. Resulting ChIP or FAIRE-DNA was compared using quantitative  
739 real time-PCR on the CFX-Connect Real-Time System (Biorad) with Sybr-green master mix  
740 using primers spanning region of interest. Real-time PCR cycle threshold (Ct) values were  
741 converted to copy number and background immunoprecipitation subtracted (no-antibody  
742 control).

743

### 744 ***ChIP-sequencing***

745 ChIP-DNA was prepared for sequencing using the NEBNext® CHIP-seq Library Prep  
746 Master Mix Set for Illumina (NEB #E6240L, New England BioLabs Inc) according to  
747 manufacturer's instructions. ChIP-DNA library was subjected to size selection with AMPure  
748 beads. The quality of the ChIP-DNA library and the fragment size of approximately 275 bp  
749 were assessed on the Bioanalyzer using the Agilent High Sensitivity DNA chip (Agilent

750 Technologies, 5067-4626). ChIP libraries were sequenced paired end on the Hiseq2500  
751 instrument at the Australian Genome Research Facility (AGRF). Differential ChIP-seq peaks  
752 were found by creating windows of counts (bigwig files normalized per 10 million reads  
753 (HOMER)) for each treatment, finding the differences between windowed counts  
754 (DeepTools) and then calling peaks in MACS2 (bdgpeakcall -c 3 -l 150 -g 300) (Zhang et al.,  
755 2008). Regions were intersected using Bedtools and annotated using HOMER, CISTROME  
756 (Liu et al., 2011) (in conjunction with BedTools) and transcription start sites taken from  
757 ENSEMBL. DAVID and Metascape (Zhou et al., 2019) were used to examine gene groups  
758 for enriched Gene Ontology terms.

759

#### 760 *ATAC-seq*

761 ATAC-seq is adapted from (Buenrostro et al., 2015). A total of 50 000 cells were lysed with  
762 cold lysis buffer for nuclei extraction. Nuclei were immediately resuspended in transposition  
763 reaction mix prepared from the Illumina Nextera DNA Sample Preparation Kit (FC-121-  
764 1030) for 30 minutes at 37°C. Transposed DNA was extracted using the Qiagen MinElute  
765 PCR Purification kit (Cat #. 28004). Resulting DNA was subjected to 5 PCR cycles on the  
766 thermocycler using a PCR primer 1 (Ad1\_noMX) and an indexed PCR primer 2. An aliquot  
767 of each sample was used subsequently in a real-time quantitative PCR for 20 cycles to  
768 determine the number of cycles required for library amplification. The amplified DNA was  
769 purified using the Qiagen MinElute PCR Purification kit. Library quality was assessed using  
770 the bioanalyzer (Agilent) to ensure that the DNA fragmentation ranges between 50-200bp  
771 and the Qubit to determine the overall DNA concentration. ATAC-DNA was sequenced  
772 paired end on the Hiseq2500 instrument at the Australian Genome Research Facility (AGRF).

773

#### 774 *Ciüider Analysis*

775 CiiiDER analysis was carried out according to (Gearing et al., 2019; Russ et al., 2017).  
776 Briefly, peaks with a length greater than 400 were filtered out. Regions of equal size were  
777 defined from 200 bases upstream to 200 bases downstream of the middle of each peak using  
778 the `Mus_musculus.GRCm38.dna.primary_assembly.fa` genome. CiiiDER analysis was  
779 performed on these regions with `JASPAR_CORE Vertebrates_2016.txt` transcription factor  
780 position frequency matrices and a deficit cut-off of 0.15.  
781

782 **References**

- 783 Agger, K., Cloos, P.A., Christensen, J., Pasini, D., Rose, S., Rappsilber, J., Issaeva, I.,  
784 Canaani, E., Salcini, A.E., and Helin, K. (2007). UTX and JMJD3 are histone H3K27  
785 demethylases involved in HOX gene regulation and development. *Nature* 449, 731-734.  
786
- 787 Araki, Y., Wang, Z., Zang, C., Wood, W.H., 3rd, Schones, D., Cui, K., Roh, T.Y., Lhotsky,  
788 B., Wersto, R.P., Peng, W., *et al.* (2009). Genome-wide analysis of histone methylation  
789 reveals chromatin state-based regulation of gene transcription and function of memory CD8+  
790 T cells. *Immunity* 30, 912-925.  
791
- 792 Badovinac, V.P., Messingham, K.A., Jabbari, A., Haring, J.S., and Harty, J.T. (2005).  
793 Accelerated CD8+ T-cell memory and prime-boost response after dendritic-cell vaccination.  
794 *Nat Med* 11, 748-756.  
795
- 796 Badovinac, V.P., Porter, B.B., and Harty, J.T. (2004). CD8+ T cell contraction is controlled  
797 by early inflammation. *Nature immunology* 5, 809-817.  
798
- 799 Buenrostro, J.D., Wu, B., Chang, H.Y., and Greenleaf, W.J. (2015). ATAC-seq: A Method  
800 for Assaying Chromatin Accessibility Genome-Wide. *Curr Protoc Mol Biol* 109, 21 29 21-  
801 29.  
802
- 803 Cao, R., Wang, L., Wang, H., Xia, L., Erdjument-Bromage, H., Tempst, P., Jones, R.S., and  
804 Zhang, Y. (2002). Role of histone H3 lysine 27 methylation in Polycomb-group silencing.  
805 *Science* 298, 1039-1043.  
806
- 807 Cook, K.D., Shpargel, K.B., Starmer, J., Whitfield-Larry, F., Conley, B., Allard, D.E., Rager,  
808 J.E., Fry, R.C., Davenport, M.L., Magnuson, T., *et al.* (2015). T Follicular Helper Cell-  
809 Dependent Clearance of a Persistent Virus Infection Requires T Cell Expression of the  
810 Histone Demethylase UTX. *Immunity* 43, 703-714.  
811
- 812 Crompton, J.G., Narayanan, M., Cuddapah, S., Roychoudhuri, R., Ji, Y., Yang, W., Patel,  
813 S.J., Sukumar, M., Palmer, D.C., Peng, W., *et al.* (2016). Lineage relationship of CD8(+) T  
814 cell subsets is revealed by progressive changes in the epigenetic landscape. *Cell Mol*  
815 *Immunol* 13, 502-513.  
816
- 817 Cruz-Guilloty, F., Pipkin, M.E., Djuretic, I.M., Levanon, D., Lotem, J., Lichtenheld, M.G.,  
818 Groner, Y., and Rao, A. (2009). Runx3 and T-box proteins cooperate to establish the  
819 transcriptional program of effector CTLs. *The Journal of experimental medicine* 206, 51-59.  
820
- 821 Denton, A.E., Russ, B.E., Doherty, P.C., Rao, S., and Turner, S.J. (2011). Differentiation-  
822 dependent functional and epigenetic landscapes for cytokine genes in virus-specific CD8+ T  
823 cells. *Proc Natl Acad Sci U S A* 108, 15306-15311.  
824
- 825 Gearing, L.J., Cumming, H.E., Chapman, R., Finkel, A.M., Woodhouse, I.B., Luu, K., Gould,  
826 J.A., Forster, S.C., and Hertzog, P.J. (2019). CiiDER: A tool for predicting and analysing  
827 transcription factor binding sites. *PLoS One* 14, e0215495.  
828
- 829 Godec, J., Cowley, G.S., Barnitz, R.A., Alkan, O., Root, D.E., Sharpe, A.H., and Haining,  
830 W.N. (2015). Inducible RNAi in vivo reveals that the transcription factor BATF is required to

831 initiate but not maintain CD8+ T-cell effector differentiation. *Proc Natl Acad Sci U S A* *112*,  
832 512-517.  
833  
834 Gray, S.M., Amezcua, R.A., Guan, T., Kleinstein, S.H., and Kaech, S.M. (2017). Polycomb  
835 Repressive Complex 2-Mediated Chromatin Repression Guides Effector CD8+ T Cell  
836 Terminal Differentiation and Loss of Multipotency. *Immunity* *46*, 596-608.  
837  
838 Intlekofer, A.M., Banerjee, A., Takemoto, N., Gordon, S.M., Dejong, C.S., Shin, H., Hunter,  
839 C.A., Wherry, E.J., Lindsten, T., and Reiner, S.L. (2008). Anomalous type 17 response to  
840 viral infection by CD8+ T cells lacking T-bet and eomesodermin. *Science* *321*, 408-411.  
841  
842 Intlekofer, A.M., Takemoto, N., Wherry, E.J., Longworth, S.A., Northrup, J.T., Palanivel,  
843 V.R., Mullen, A.C., Gasink, C.R., Kaech, S.M., Miller, J.D., *et al.* (2005). Effector and  
844 memory CD8+ T cell fate coupled by T-bet and eomesodermin. *Nature immunology* *6*, 1236-  
845 1244.  
846  
847 Jenkins, M.R., Kedzierska, K., Doherty, P.C., and Turner, S.J. (2007). Heterogeneity of  
848 effector phenotype for acute phase and memory influenza A virus-specific CTL. *J Immunol*  
849 *179*, 64-70.  
850  
851 Kaech, S.M., and Ahmed, R. (2001). Memory CD8+ T cell differentiation: initial antigen  
852 encounter triggers a developmental program in naive cells. *Nature immunology* *2*, 415-422.  
853  
854 Kaech, S.M., Hemby, S., Kersh, E., and Ahmed, R. (2002). Molecular and functional  
855 profiling of memory CD8 T cell differentiation. *Cell* *111*, 837-851.  
856  
857 Kagi, D., Ledermann, B., Burki, K., Seiler, P., Odermatt, B., Olsen, K.J., Podack, E.R.,  
858 Zinkernagel, R.M., and Hengartner, H. (1994). Cytotoxicity mediated by T cells and natural  
859 killer cells is greatly impaired in perforin-deficient mice. *Nature* *369*, 31-37.  
860  
861 Kakaradov, B., Arsenio, J., Widjaja, C.E., He, Z., Aigner, S., Metz, P.J., Yu, B., Wehrens,  
862 E.J., Lopez, J., Kim, S.H., *et al.* (2017). Early transcriptional and epigenetic regulation of  
863 CD8(+) T cell differentiation revealed by single-cell RNA sequencing. *Nature immunology*  
864 *18*, 422-432.  
865  
866 Kallies, A., Xin, A., Belz, G.T., and Nutt, S.L. (2009). Blimp-1 transcription factor is  
867 required for the differentiation of effector CD8(+) T cells and memory responses. *Immunity*  
868 *31*, 283-295.  
869  
870 Kouzarides, T. (2007). Chromatin modifications and their function. *Cell* *128*, 693-705.  
871  
872 Kruidenier, L., Chung, C.W., Cheng, Z., Liddle, J., Che, K., Joberty, G., Bantscheff, M.,  
873 Bountra, C., Bridges, A., Diallo, H., *et al.* (2012). A selective jumonji H3K27 demethylase  
874 inhibitor modulates the proinflammatory macrophage response. *Nature* *488*, 404-408.  
875  
876 Kurachi, M., Barnitz, R.A., Yosef, N., Odorizzi, P.M., DiIorio, M.A., Lemieux, M.E., Yates,  
877 K., Godec, J., Klatt, M.G., Regev, A., *et al.* (2014). The transcription factor BATF operates  
878 as an essential differentiation checkpoint in early effector CD8+ T cells. *Nature immunology*  
879 *15*, 373-383.  
880



- 881 La Gruta, N.L., Turner, S.J., and Doherty, P.C. (2004). Hierarchies in cytokine expression  
882 profiles for acute and resolving influenza virus-specific CD8+ T cell responses: correlation of  
883 cytokine profile and TCR avidity. *J Immunol* *172*, 5553-5560.  
884
- 885 Lalvani, A., Brookes, R., Hambleton, S., Britton, W.J., Hill, A.V., and McMichael, A.J.  
886 (1997). Rapid effector function in CD8+ memory T cells. *J Exp Med* *186*, 859-865.  
887
- 888 LaMere, S.A., Thompson, R.C., Meng, X., Komori, H.K., Mark, A., and Salomon, D.R.  
889 (2017). H3K27 Methylation Dynamics during CD4 T Cell Activation: Regulation of  
890 JAK/STAT and IL12RB2 Expression by JMJD3. *J Immunol* *199*, 3158-3175.  
891
- 892 Lawrence, C.W., and Braciale, T.J. (2004). Activation, differentiation, and migration of naive  
893 virus-specific CD8+ T cells during pulmonary influenza virus infection. *J Immunol* *173*,  
894 1209-1218.  
895
- 896 Li, Q., Zou, J., Wang, M., Ding, X., Chepelev, I., Zhou, X., Zhao, W., Wei, G., Cui, J., Zhao,  
897 K., *et al.* (2014). Critical role of histone demethylase Jmjd3 in the regulation of CD4+ T-cell  
898 differentiation. *Nat Commun* *5*, 5780.  
899
- 900 Liu, T., Ortiz, J.A., Taing, L., Meyer, C.A., Lee, B., Zhang, Y., Shin, H., Wong, S.S., Ma, J.,  
901 Lei, Y., *et al.* (2011). Cistrome: an integrative platform for transcriptional regulation studies.  
902 *Genome Biol* *12*, R83.  
903
- 904 Mackay, L.K., Wynne-Jones, E., Freestone, D., Pellicci, D.G., Mielke, L.A., Newman, D.M.,  
905 Braun, A., Masson, F., Kallies, A., Belz, G.T., and Carbone, F.R. (2015). T-box  
906 Transcription Factors Combine with the Cytokines TGF-beta and IL-15 to Control Tissue-  
907 Resident Memory T Cell Fate. *Immunity* *43*, 1101-1111.  
908
- 909 Manna, S., Kim, J.K., Bauge, C., Cam, M., Zhao, Y., Shetty, J., Vacchio, M.S., Castro, E.,  
910 Tran, B., Tessarollo, L., and Bosselut, R. (2015). Histone H3 Lysine 27 demethylases Jmjd3  
911 and Utx are required for T-cell differentiation. *Nat Commun* *6*, 8152.  
912
- 913 Marchingo, J.M., Kan, A., Sutherland, R.M., Duffy, K.R., Wellard, C.J., Belz, G.T., Lew,  
914 A.M., Dowling, M.R., Heinzl, S., and Hodgkin, P.D. (2014). T cell signaling. Antigen  
915 affinity, costimulation, and cytokine inputs sum linearly to amplify T cell expansion. *Science*  
916 *346*, 1123-1127.  
917
- 918 Miller, S.A., Huang, A.C., Miazgowiec, M.M., Brassil, M.M., and Weinmann, A.S. (2008).  
919 Coordinated but physically separable interaction with H3K27-demethylase and H3K4-  
920 methyltransferase activities are required for T-box protein-mediated activation of  
921 developmental gene expression. *Genes Dev* *22*, 2980-2993.  
922
- 923 Milner, J.J., Toma, C., Yu, B., Zhang, K., Omilusik, K., Phan, A.T., Wang, D., Getzler, A.J.,  
924 Nguyen, T., Crotty, S., *et al.* (2017). Runx3 programs CD8(+) T cell residency in non-  
925 lymphoid tissues and tumours. *Nature* *552*, 253-257.  
926
- 927 Moffat, J.M., Gebhardt, T., Doherty, P.C., Turner, S.J., and Mintern, J.D. (2009). Granzyme  
928 A expression reveals distinct cytolytic CTL subsets following influenza A virus infection.  
929 *Eur J Immunol* *39*, 1203-1210.  
930

- 931 Northrop, J.K., Wells, A.D., and Shen, H. (2008). Cutting edge: chromatin remodeling as a  
932 molecular basis for the enhanced functionality of memory CD8 T cells. *J Immunol* *181*, 865-  
933 868.
- 934
- 935 Oehen, S., and Brduscha-Riem, K. (1998). Differentiation of naive CTL to effector and  
936 memory CTL: correlation of effector function with phenotype and cell division. *J Immunol*  
937 *161*, 5338-5346.
- 938
- 939 Pace, L., Goudot, C., Zueva, E., Gueguen, P., Burgdorf, N., Waterfall, J.J., Quivy, J.P.,  
940 Almouzni, G., and Amigorena, S. (2018). The epigenetic control of stemness in CD8(+) T  
941 cell fate commitment. *Science* *359*, 177-186.
- 942
- 943 Peixoto, A., Evaristo, C., Munitic, I., Monteiro, M., Charbit, A., Rocha, B., and Veiga-  
944 Fernandes, H. (2007). CD8 single-cell gene coexpression reveals three different effector  
945 types present at distinct phases of the immune response. *J Exp Med* *204*, 1193-1205.
- 946
- 947 Prier, J.E., Blewitt, M.E., Dickins, R.A., and Turner, S.J. (2019a). Development of a KDM6b  
948 shRNA conditional knock down mouse model. *BioRxiv*.
- 949
- 950 Prier, J.E., Li, J., Gearing, L.J., Olshansky, M., Sng, X.Y.X., Hertzog, P.J., and Turner, S.J.  
951 (2019b). Early T-BET Expression Ensures an Appropriate CD8(+) Lineage-Specific  
952 Transcriptional Landscape after Influenza A Virus Infection. *J Immunol*.
- 953
- 954 Rea, S., Eisenhaber, F., O'Carroll, D., Strahl, B.D., Sun, Z.W., Schmid, M., Opravil, S.,  
955 Mechtler, K., Ponting, C.P., Allis, C.D., and Jenuwein, T. (2000). Regulation of chromatin  
956 structure by site-specific histone H3 methyltransferases. *Nature* *406*, 593-599.
- 957
- 958 Russ, B.E., Olshansky, M., Smallwood, H.S., Li, J., Denton, A.E., Prier, J.E., Stock, A.T.,  
959 Croom, H.A., Cullen, J.G., Nguyen, M.L., *et al.* (2014). Distinct epigenetic signatures  
960 delineate transcriptional programs during virus-specific CD8(+) T cell differentiation.  
961 *Immunity* *41*, 853-865.
- 962
- 963 Russ, B.E., Olshansky, M., Li, J., Nguyen, M.L.T., Gearing, L.J., Nguyen, T.H.O., Olson,  
964 M.R., McQuilton, H.A., Nussing, S., Houry, G., *et al.* (2017). Regulation of H3K4me3 at  
965 Transcriptional Enhancers Characterizes Acquisition of Virus-Specific CD8(+) T Cell-  
966 Lineage-Specific Function. *Cell Rep* *21*, 3624-3636.
- 967
- 968 Schlub, T.E., Venturi, V., Kedzierska, K., Wellard, C., Doherty, P.C., Turner, S.J., Ribeiro,  
969 R.M., Hodgkin, P.D., and Davenport, M.P. (2009). Division-linked differentiation can  
970 account for CD8+ T-cell phenotype in vivo. *Eur J Immunol* *39*, 67-77.
- 971
- 972 Scott-Browne, J.P., Lopez-Moyado, I.F., Trifari, S., Wong, V., Chavez, L., Rao, A., and  
973 Pereira, R.M. (2016). Dynamic Changes in Chromatin Accessibility Occur in CD8+ T Cells  
974 Responding to Viral Infection. *Immunity* *45*, 1327-1340.
- 975
- 976 Sen, D.R., Kaminski, J., Barnitz, R.A., Kurachi, M., Gerdemann, U., Yates, K.B., Tsao,  
977 H.W., Godec, J., LaFleur, M.W., Brown, F.D., *et al.* (2016). The epigenetic landscape of T  
978 cell exhaustion. *Science* *354*, 1165-1169.
- 979

- 980 van Stipdonk, M.J., Hardenberg, G., Bijker, M.S., Lemmens, E.E., Droin, N.M., Green, D.R.,  
981 and Schoenberger, S.P. (2003). Dynamic programming of CD8+ T lymphocyte responses.  
982 *Nature immunology* 4, 361-365.  
983
- 984 van Stipdonk, M.J., Lemmens, E.E., and Schoenberger, S.P. (2001). Naive CTLs require a  
985 single brief period of antigenic stimulation for clonal expansion and differentiation. *Nature*  
986 *immunology* 2, 423-429.  
987
- 988 Veiga-Fernandes, H., Walter, U., Bourgeois, C., McLean, A., and Rocha, B. (2000).  
989 Response of naive and memory CD8+ T cells to antigen stimulation in vivo. *Nature*  
990 *immunology* 1, 47-53.  
991
- 992 Wang, D., Diao, H., Getzler, A.J., Rogal, W., Frederick, M.A., Milner, J., Yu, B., Crotty, S.,  
993 Goldrath, A.W., and Pipkin, M.E. (2018). The Transcription Factor Runx3 Establishes  
994 Chromatin Accessibility of cis-Regulatory Landscapes that Drive Memory Cytotoxic T  
995 Lymphocyte Formation. *Immunity* 48, 659-674 e656.  
996
- 997 Wei, G., Wei, L., Zhu, J., Zang, C., Hu-Li, J., Yao, Z., Cui, K., Kanno, Y., Roh, T.Y.,  
998 Watford, W.T., *et al.* (2009). Global mapping of H3K4me3 and H3K27me3 reveals  
999 specificity and plasticity in lineage fate determination of differentiating CD4+ T cells.  
1000 *Immunity* 30, 155-167.  
1001
- 1002 Xin, A., Masson, F., Liao, Y., Preston, S., Guan, T., Gloury, R., Olshansky, M., Lin, J.X., Li,  
1003 P., Speed, T.P., *et al.* (2016). A molecular threshold for effector CD8(+) T cell differentiation  
1004 controlled by transcription factors Blimp-1 and T-bet. *Nature immunology* 17, 422-432.  
1005
- 1006 Yamada, T., Nabe, S., Toriyama, K., Suzuki, J., Inoue, K., Imai, Y., Shiraishi, A., Takenaka,  
1007 K., Yasukawa, M., and Yamashita, M. (2019). Histone H3K27 Demethylase Negatively  
1008 Controls the Memory Formation of Antigen-Stimulated CD8(+) T Cells. *J Immunol* 202,  
1009 1088-1098.  
1010
- 1011 Zediak, V.P., Johnnidis, J.B., Wherry, E.J., and Berger, S.L. (2011). Cutting edge:  
1012 persistently open chromatin at effector gene loci in resting memory CD8+ T cells  
1013 independent of transcriptional status. *J Immunol* 186, 2705-2709.  
1014
- 1015 Zehn, D., Lee, S.Y., and Bevan, M.J. (2009). Complete but curtailed T-cell response to very  
1016 low-affinity antigen. *Nature* 458, 211-214.  
1017
- 1018 Zhang, J.A., Mortazavi, A., Williams, B.A., Wold, B.J., and Rothenberg, E.V. (2012).  
1019 Dynamic transformations of genome-wide epigenetic marking and transcriptional control  
1020 establish T cell identity. *Cell* 149, 467-482.  
1021
- 1022 Zhang, Y., Liu, T., Meyer, C.A., Eeckhoute, J., Johnson, D.S., Bernstein, B.E., Nusbaum, C.,  
1023 Myers, R.M., Brown, M., Li, W., and Liu, X.S. (2008). Model-based analysis of ChIP-Seq  
1024 (MACS). *Genome Biol* 9, R137.  
1025
- 1026 Zhou, Y., Zhou, B., Pache, L., Chang, M., Khodabakhshi, A.H., Tanaseichuk, O., Benner, C.,  
1027 and Chanda, S.K. (2019). Metascape provides a biologist-oriented resource for the analysis of  
1028 systems-level datasets. *Nat Commun* 10, 1523.  
1029

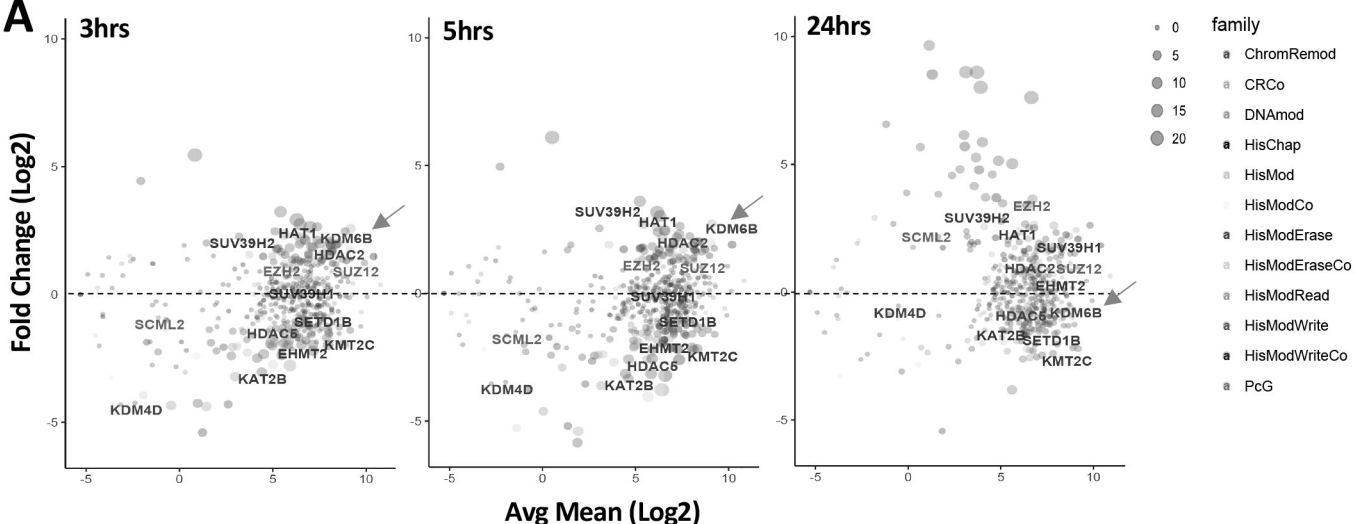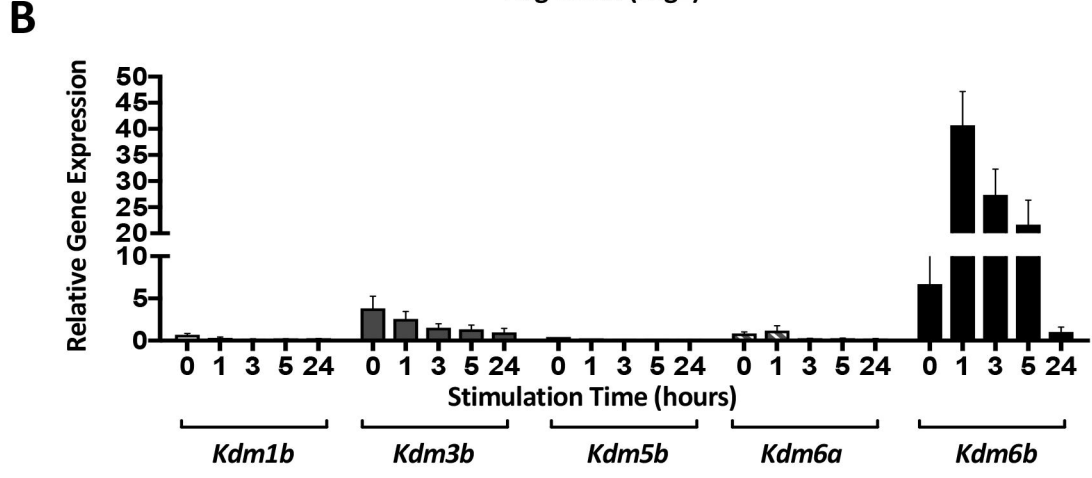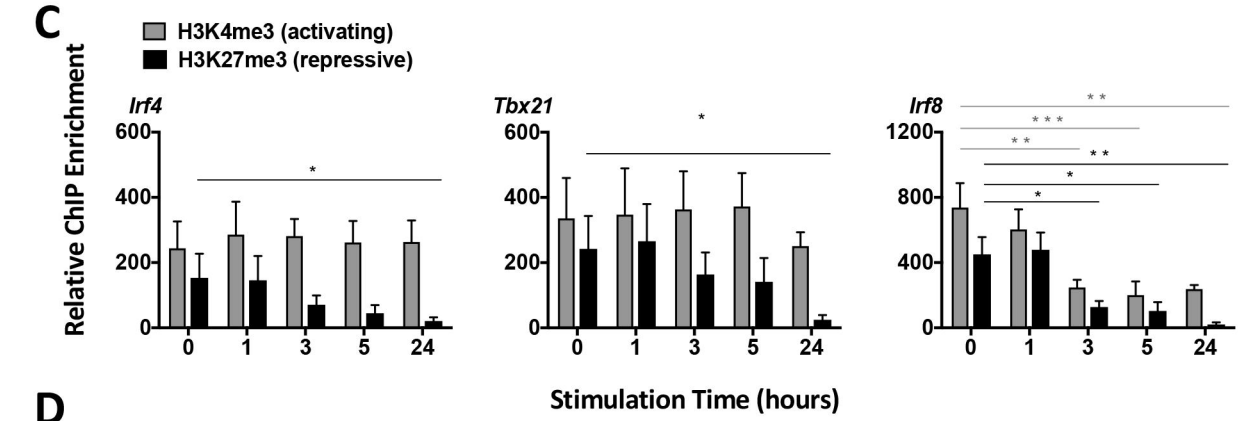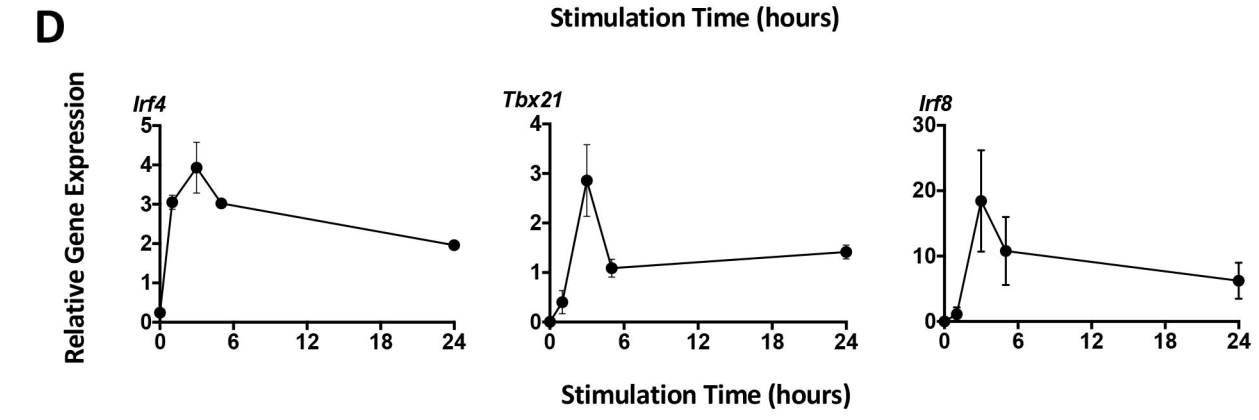

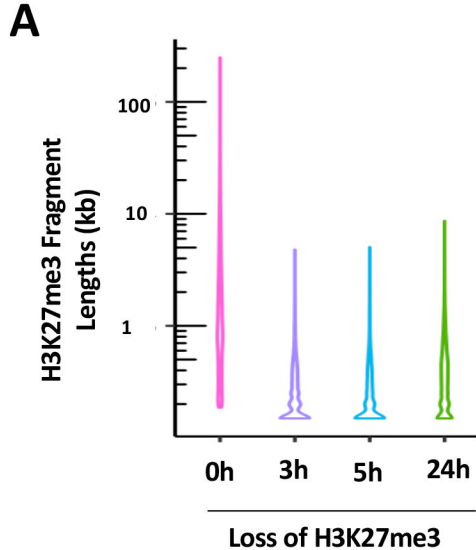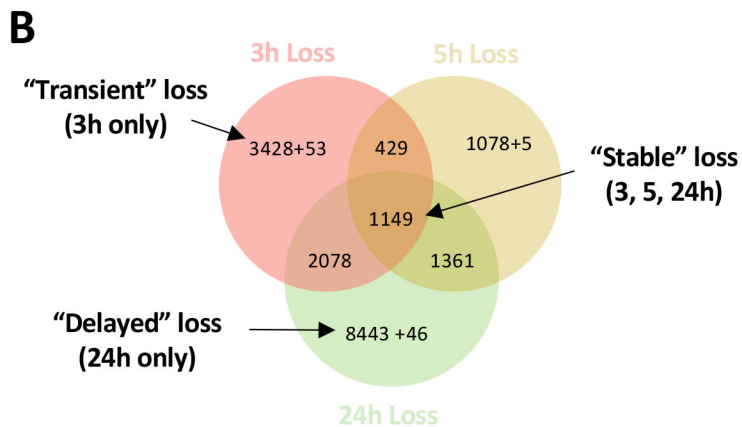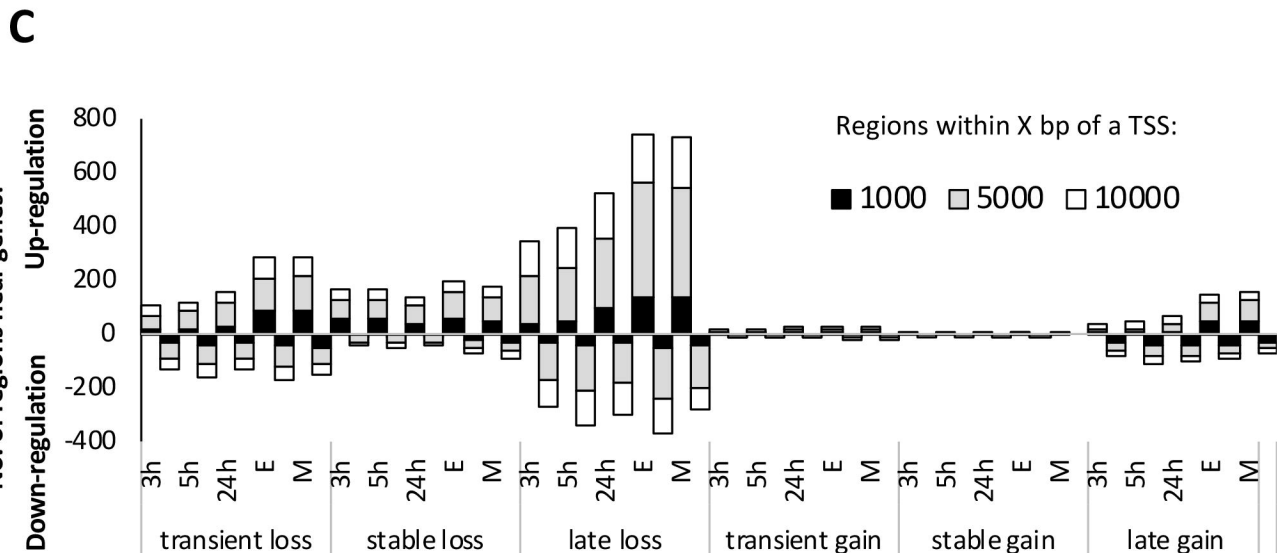

**A**

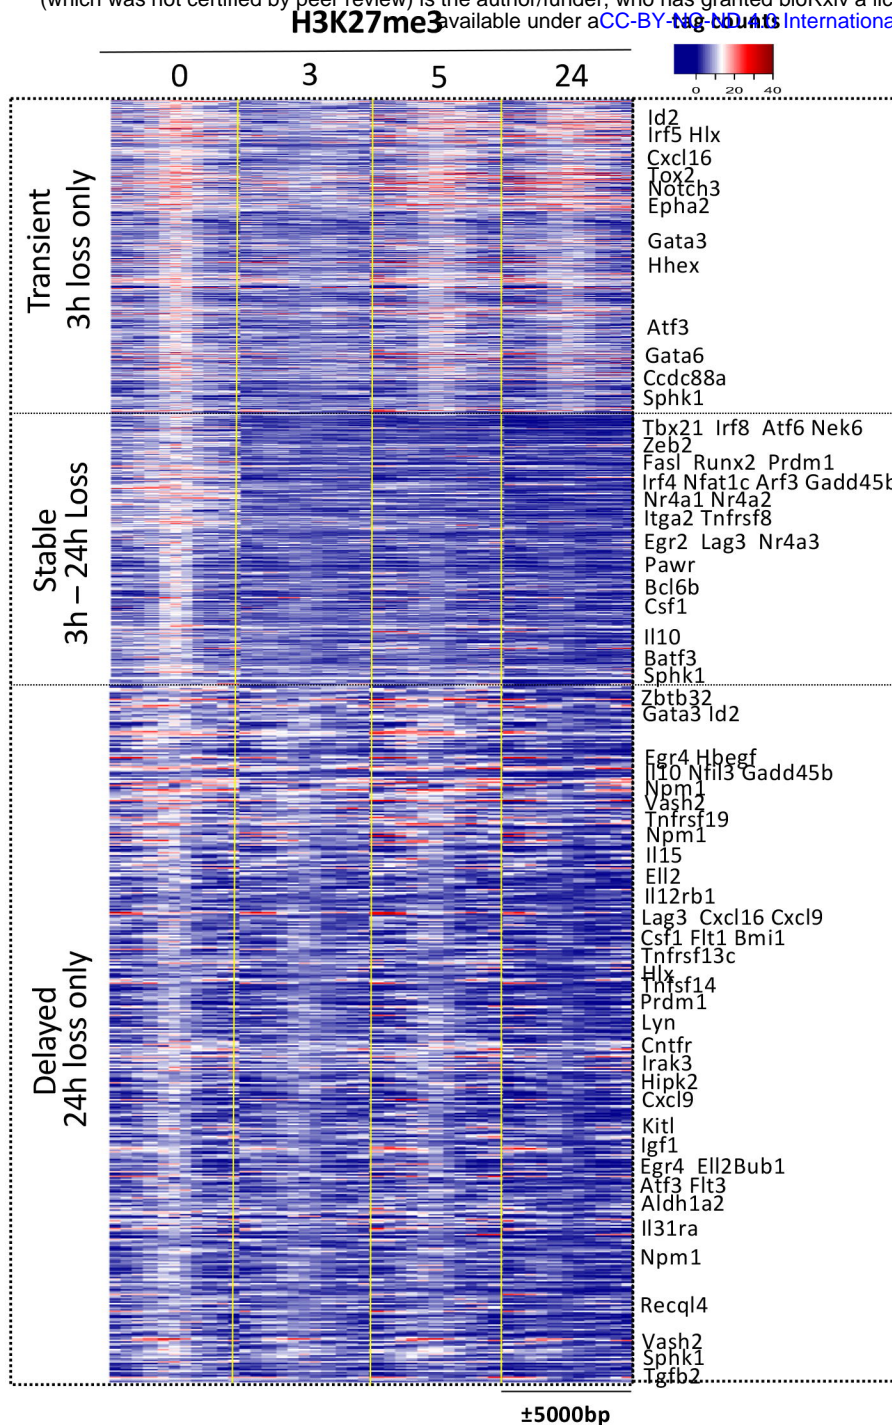

**B**

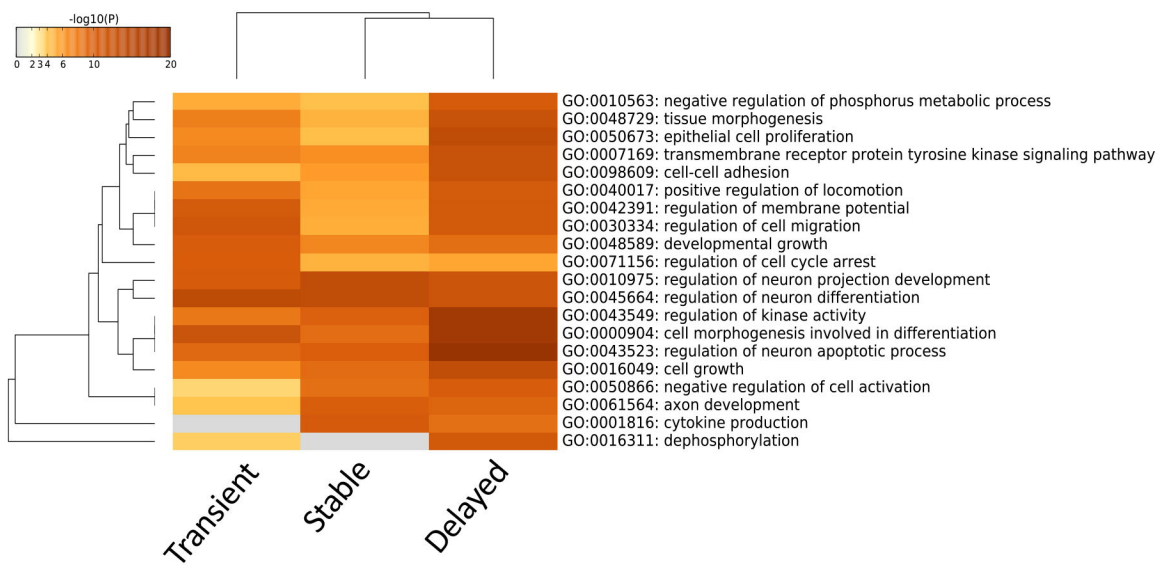

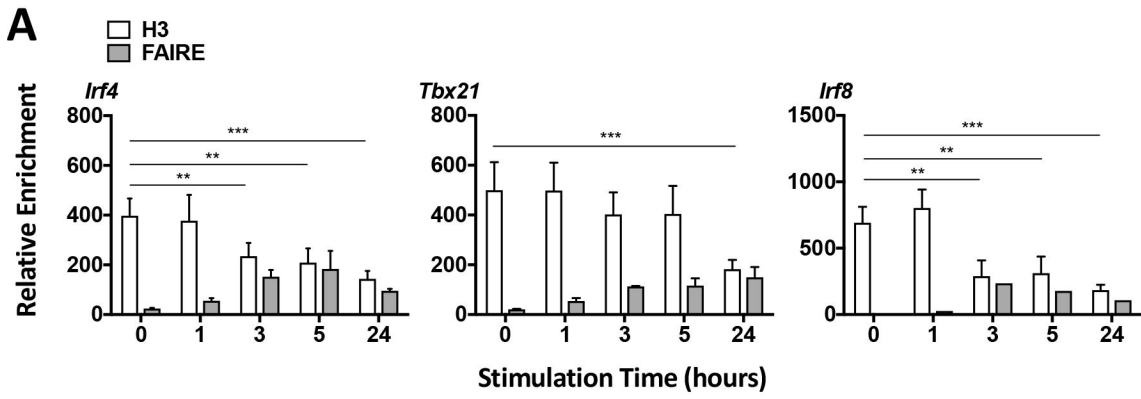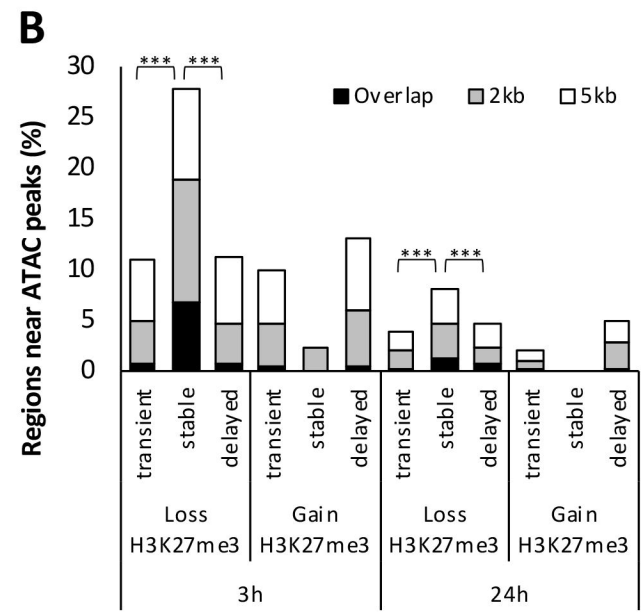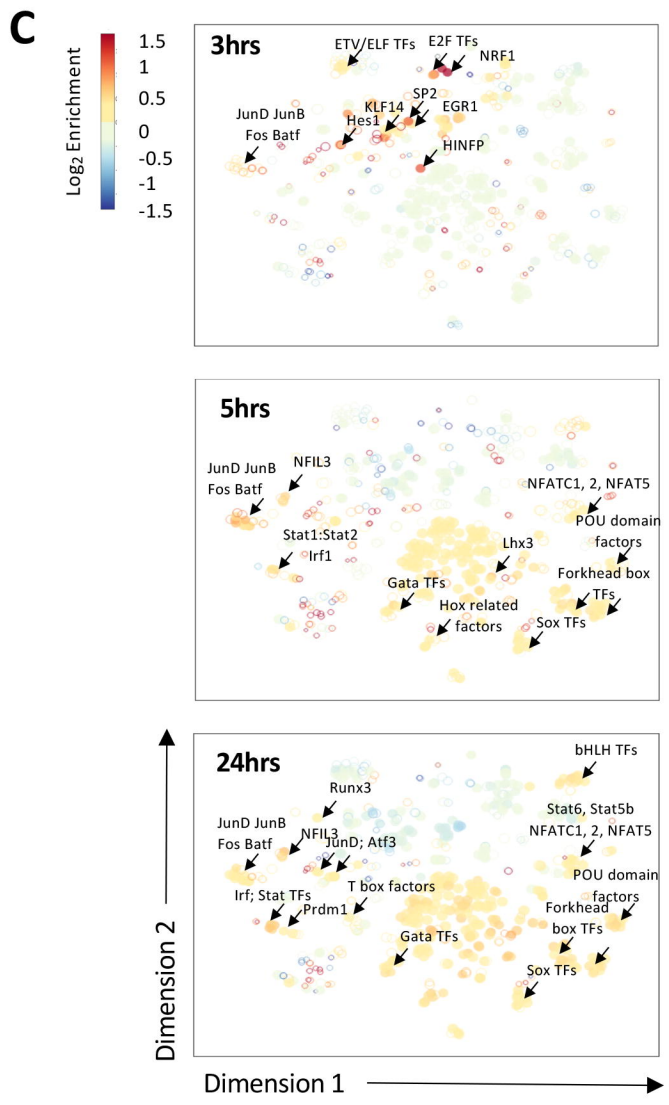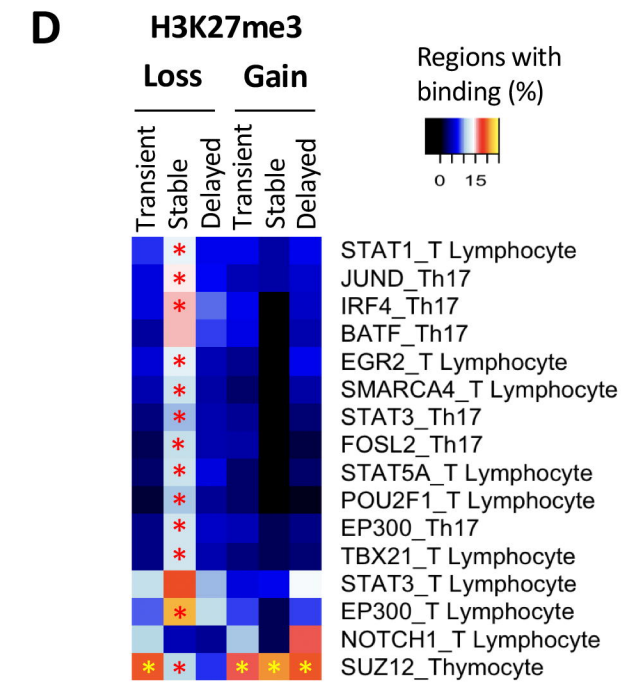

**E**

● Lymphocyte    ● Other cell types

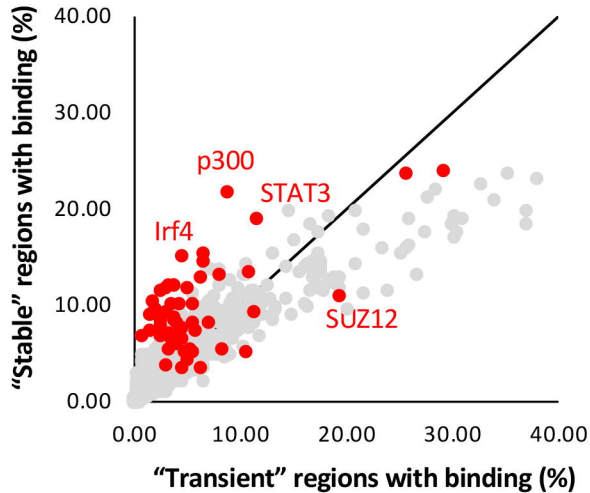**F**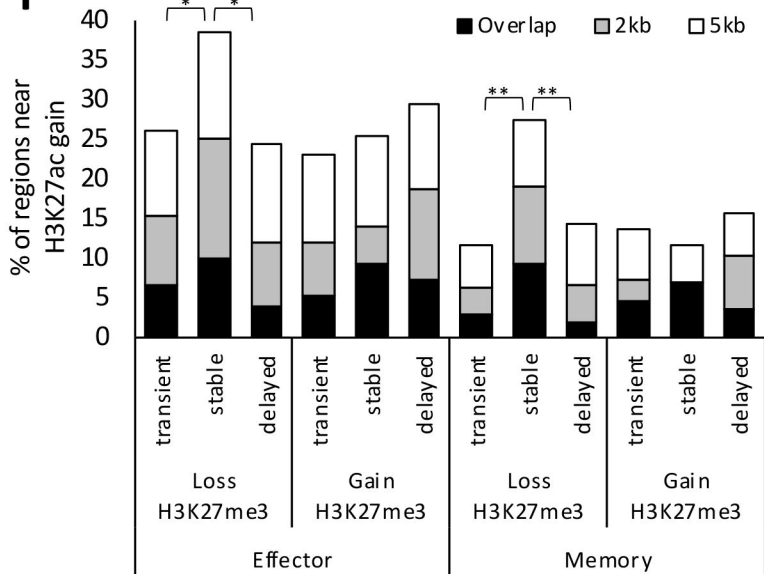



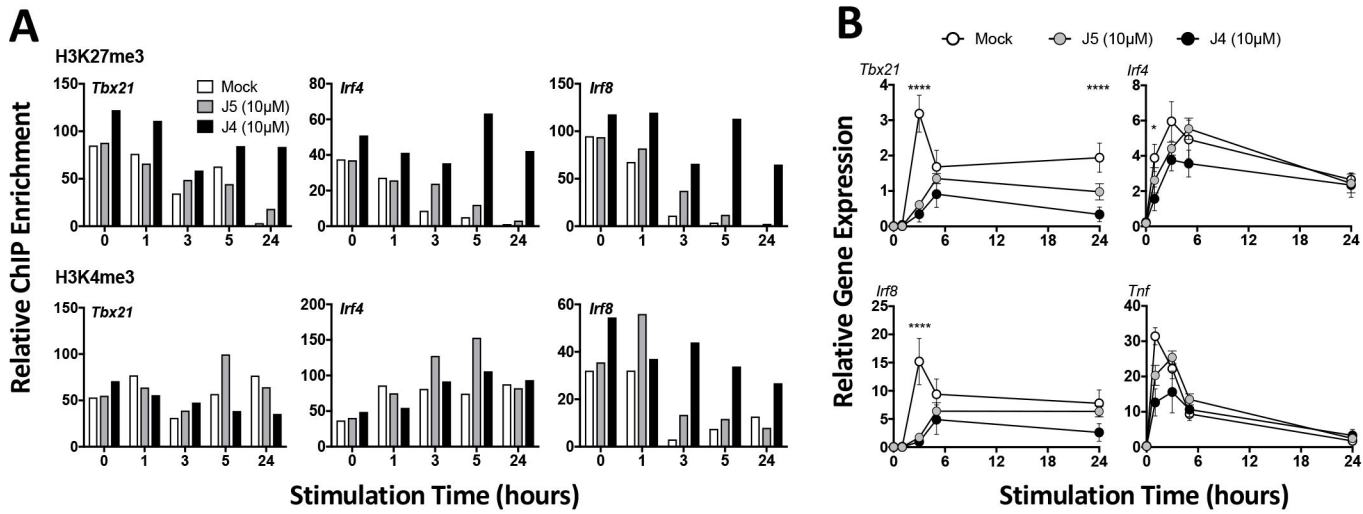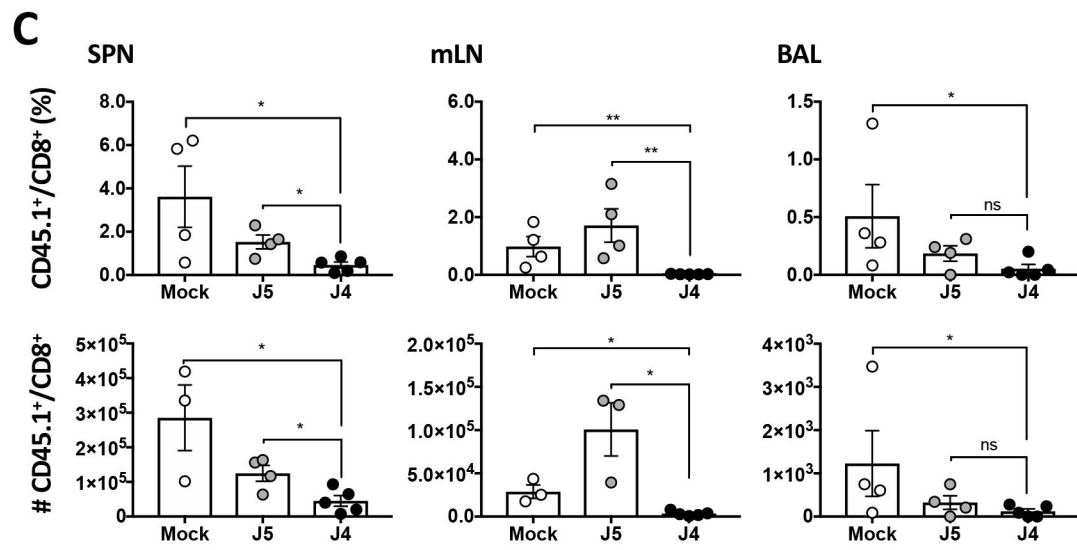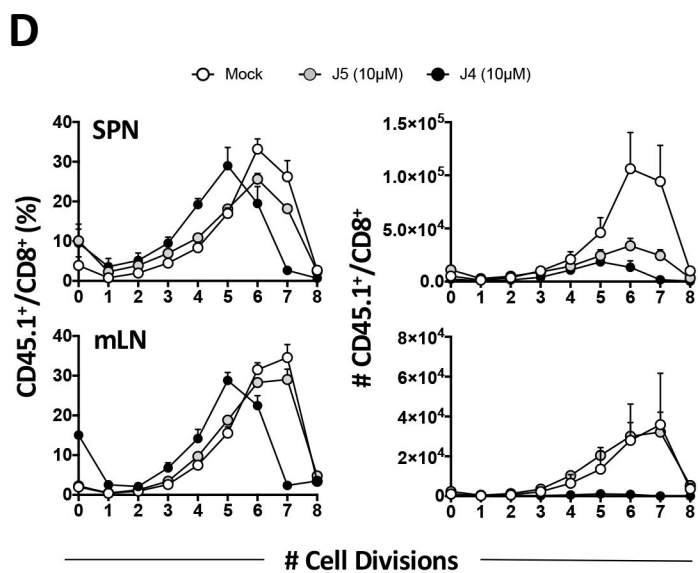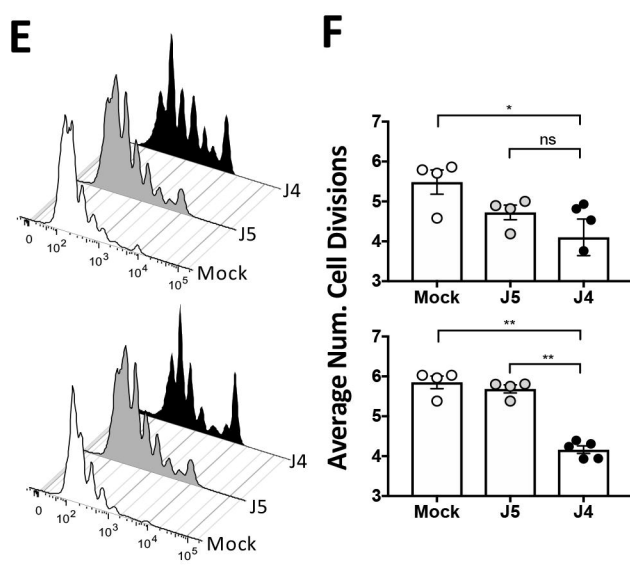

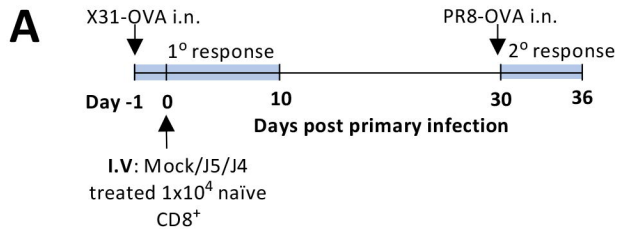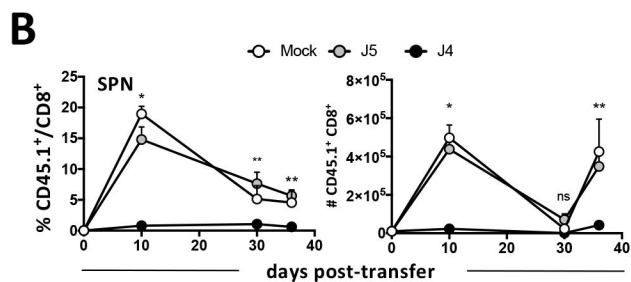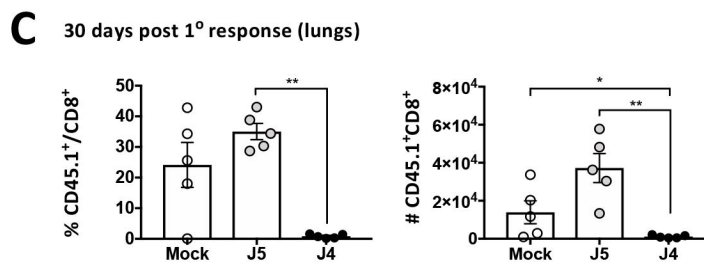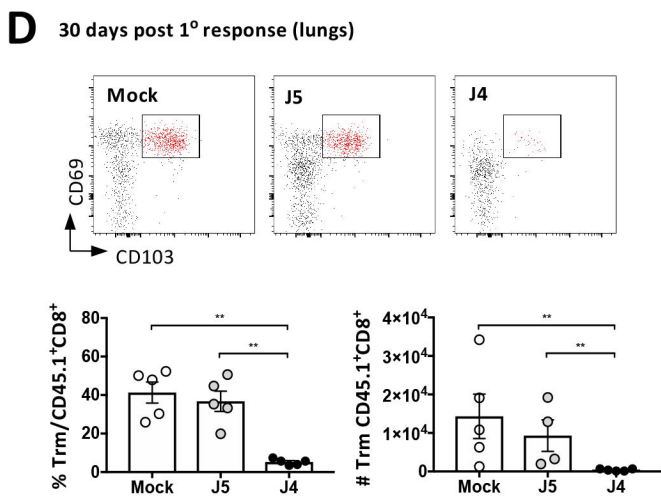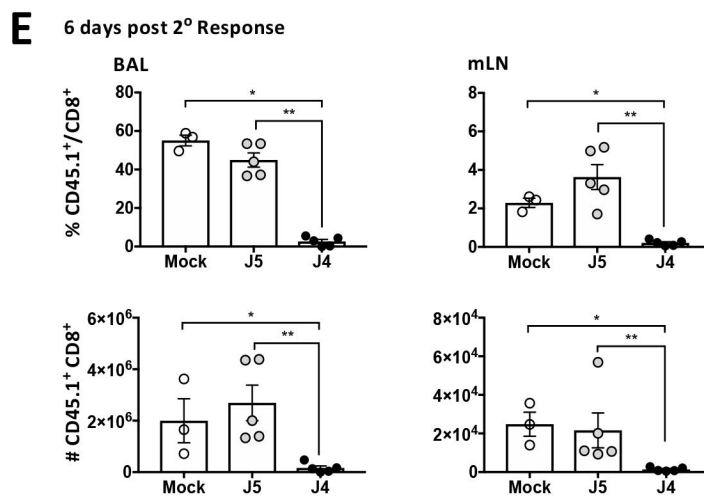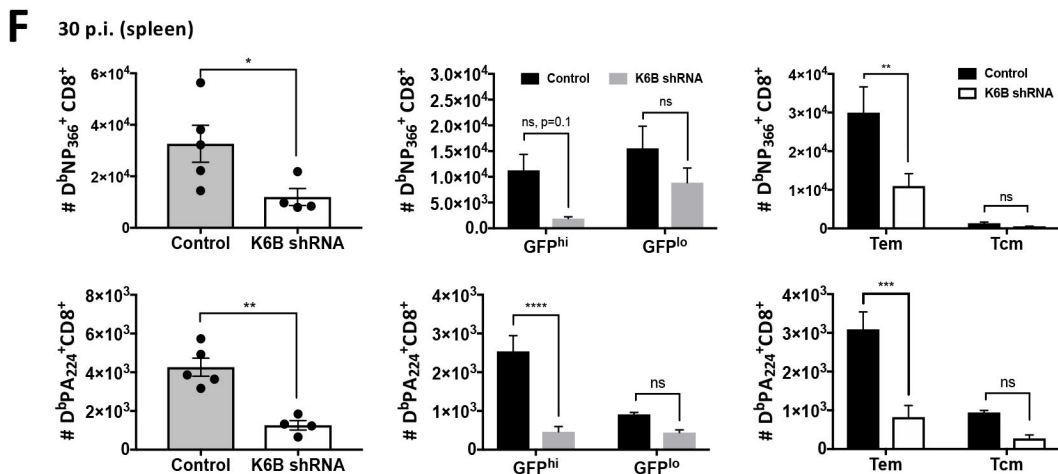

Source: https://www.biorxiv.org/content/10.1101/2020.02.03.933218v1.full.pdf
